1           **The Trithorax group protein dMLL3/4 instructs the assembly of the**  
2                                           **zygotic genome at fertilization**

3

4   Pedro Prudêncio<sup>2,3</sup>, Leonardo G. Guilgur<sup>1</sup>, João Sobral<sup>1</sup>, Jörg D. Becker<sup>1</sup>, Rui  
5   Gonçalo Martinho<sup>2,3,\*</sup> and Paulo Navarro-Costa<sup>1,2,\*</sup>

6

7   1- Instituto Gulbenkian de Ciência. Oeiras, Portugal.

8   2- Center for Biomedical Research, Universidade do Algarve. Faro, Portugal.

9   3- Instituto de Medicina Molecular. Lisboa, Portugal.

10

11   \*- Co-corresponding authors: Rui G. Martinho ([rgmartinho@ualg.pt](mailto:rgmartinho@ualg.pt)) and Paulo

12   Navarro-Costa ([navarro-costa@medicina.ulisboa.pt](mailto:navarro-costa@medicina.ulisboa.pt)).

13

14   ORCID id: Rui Gonçalo Martinho ([orcid.org/0000-0002-1641-3403](https://orcid.org/0000-0002-1641-3403))

15   ORCID id: Paulo Navarro-Costa ([orcid.org/0000-0002-8543-4179](https://orcid.org/0000-0002-8543-4179))

1

2 **ABSTRACT**

3 The transition from fertilized oocyte to totipotent embryo relies on maternally-  
4 provided factors that are synthesized and accumulated in developing oocytes.  
5 Yet, it is still unclear how oocytes regulate the expression of these embryo fate-  
6 promoting genes within the general transcriptional program of oogenesis. Here  
7 we report that the *Drosophila* Trithorax group protein MLL3/4 (dMLL3/4, also  
8 known as Trr) is essential for the transition to embryo fate at fertilization. In the  
9 absence of dMLL3/4, oocytes develop normally but fail to initiate the embryo  
10 mitotic divisions after fertilization. This incapability results from defects in both  
11 paternal genome reprogramming and maternal meiotic completion. We show  
12 that, during oogenesis, dMLL3/4 promotes the expression of a functionally  
13 coherent gene subset that is later required for the correct assembly of the  
14 zygotic genome. Accordingly, we identify the evolutionarily-conserved IDGF4  
15 glycoprotein (known as oviductin in mammals) as a new oocyte-to-embryo  
16 transition gene under dMLL3/4 transcriptional control. Based on these  
17 observations, we propose that dMLL3/4 plays an instructive role in the oocyte-  
18 to-embryo transition that is functionally uncoupled from the requirements of  
19 normal oocyte differentiation.

20

21 Keywords: *Drosophila* / fertilization / zygote / chromatin / Trithorax

## 1 INTRODUCTION

2 Fertilization triggers the conversion of two terminally-differentiated haploid cells  
3 (the sperm and the oocyte) into a diploid totipotent embryo (the zygote). This  
4 transition requires a profound reprogramming of many of the cellular pathways  
5 operating in the fertilized oocyte, particularly those impinging on chromatin  
6 remodeling, cell cycle control and gene expression regulation [1]. Collectively,  
7 these changes are responsible for the oocyte-to-embryo transition, arguably  
8 one of the most dramatic cell fate changes in development.

9 A central feature of the oocyte-to-embryo transition is the assembly of the  
10 zygotic genome. To do so, the fertilized oocyte must merge the sperm-borne  
11 paternal genome with its maternal counterpart. Yet, this assembly is hindered  
12 by the extremely asymmetric state of parental chromatin at fertilization: the  
13 compact paternal chromatin is, in most animal species, histone-depleted and  
14 post-meiotic, while maternal chromatin remains histone-associated and  
15 meiotically-arrested [2,3]. Such asymmetry is resolved by the remodeling of the  
16 parental genomes at fertilization [4,5]. In this process, the paternal genome is  
17 decondensed through the replacement of the sperm nuclear basic proteins with  
18 maternal histones, while the maternal genome completes meiosis. Each of  
19 these events leads to the formation of a pronucleus: a nucleosome-based  
20 interphasic nucleus containing either the sperm or the oocyte-derived genomic  
21 information. The establishment of the functionally-equivalent paternal and  
22 maternal pronuclei allows the merging, at the first mitotic division, of the  
23 parental chromatin into a single zygotic genome.

1 A remarkable aspect of the oocyte-to-embryo transition is that it occurs in the  
2 absence of transcription [6]. Such constrain implies that the molecular  
3 determinants driving the acquisition of embryo fate, such as those involved in  
4 the assembly of the zygotic genome, must be synthesized during oogenesis and  
5 stored in the mature oocyte [7,8]. The genes coding for this unique program are  
6 referred to as maternal effect genes: a highly specialized repertoire responsible  
7 for priming and sustaining embryo development until the activation of zygotic  
8 transcription at the midblastula transition. It can be argued that the expression  
9 of these maternal effect genes during oogenesis poses a peculiar challenge to  
10 the oocyte. Indeed, developing oocytes must successfully coordinate two gene  
11 expression programs with essentially opposing outcomes: one that maintains  
12 oocyte fate as the female gamete differentiates, the other responsible for  
13 erasing such fate after fertilization.

14 Recently, the two chromatin regulators Mixed-lineage leukemia 3 and Mixed-  
15 lineage leukemia 4 (collectively referred to as MLL3/4) were shown to control  
16 mammalian cell fate transition to the pluripotent state during reprogramming [9].  
17 However, despite being essential for cell fate transition, MLL3/4 were  
18 intriguingly dispensable for maintaining cell identity. MLL3/4 are part of the  
19 Trithorax group (TrxG) of proteins, a family of chromatin regulators previously  
20 proposed to function as maternal effect genes [10]. Based on these  
21 observations, we set out to determine the potential role of MLL3/4 in the oocyte-  
22 to-embryo transition.

23 Here, we show that *Drosophila* MLL3/4 (dMLL3/4, also known as Trr) is  
24 essential for the transition to embryo fate at fertilization but not for the

1 maintenance of oocyte identity. More specifically, dMLL3/4 is dispensable for  
2 normal oocyte differentiation but critically required for the correct assembly of  
3 the zygotic genome at fertilization. An important aspect of such requirement is  
4 the dMLL3/4-mediated regulation of gene expression during oogenesis.  
5 Accordingly, we report the identification of a novel oocyte-to-embryo transition  
6 gene under dMLL3/4 transcriptional control.

7

## 8 **RESULTS AND DISCUSSION**

### 9 **dMLL3/4 is essential for entry into embryogenesis**

10 dMLL3/4 is an essential gene responsible for the monomethylation of histone  
11 H3 lysine 4 (H3K4) at enhancers and for the regulated activation of gene  
12 expression during development [11-13]. The functions of dMLL3/4 have been  
13 evolutionarily conserved [14,15], and this gene has two partially redundant  
14 mammalian homologs (MLL3 and MLL4) [16,17], both jointly required for cell  
15 fate transition but not for cell identity maintenance [9].

16 To test the hypothesis that dMLL3/4 promotes the oocyte-to-embryo transition  
17 at fertilization, we specifically depleted this chromatin regulator during  
18 oogenesis. For this, both an *in vivo* RNA interference (RNAi) approach and  
19 germ line mutant clone analysis (induced by the FLP/FRT recombination  
20 system) were used. The first approach ensures the post-transcriptional silencing  
21 of dMLL3/4 specifically in developing germ cells, while the second induces, in  
22 the female germ line, the homozygous mutant state of a previously identified  
23 dMLL3/4 null allele (*trr*<sup>1</sup>, here referred to as *dml3/4*<sup>-/-</sup>) [18]. Both approaches  
24 resulted in an equally strong depletion of dMLL3/4 in whole ovaries and in early

1 embryos (**Fig. 1A**). This result confirmed that our experimental conditions are  
2 associated with a significant reduction of dMLL3/4 levels in the female germ  
3 line.

4 We next tested the effect of dMLL3/4 depletion on female fertility. We observed  
5 that, after being mated with wild-type males, less than 1% of all eggs laid by  
6 dMLL3/4-depleted females could hatch (n= 543 and 668, for the RNAi and  
7 *dml3/4*<sup>-/-</sup> groups, respectively; **Fig. 1B**). This phenotype was limited to the  
8 female germ line, as the knockdown of dMLL3/4 during sperm differentiation  
9 had no obvious effects on male fertility (as assessed by mating dMLL3/4-  
10 depleted males with wild-type females). The origin of the female infertility  
11 phenotype could be traced to the fact that dMLL3/4-depleted eggs fail to enter  
12 embryogenesis (**Fig. 1C**). Such defect was manifested by an incapability of  
13 initiating the embryo mitotic divisions (n= 150 for each tested group).

14

#### 15 **dMLL3/4 is dispensable for oogenesis**

16 The germ line-specific depletion of dMLL3/4 had no obvious impact on oocyte  
17 development. Indeed, ovary morphology and mature egg size were  
18 indistinguishable between control and dMLL3/4-depleted conditions (**Fig. 1D**).  
19 Supporting this observation, we failed to identify any cytological defects in either  
20 the germ cell or somatic compartments of depleted ovaries (**Fig. 1E** and  
21 **Supplementary Fig.1**). Equally unaffected was the meiotic metaphase I (MI)  
22 arrest of mature, non-activated eggs. More specifically, dMLL3/4 depletion did  
23 not disturb the retraction of the meiotic chromosomes into the MI plate (n= 40,

1 **Fig. 1F)**, nor did it impact prophase I oocyte chromatin architecture (n= 10, **Fig.**  
2 **1E** and **Supplementary Fig.2).**

3 Collectively, the germ line-specific depletion of dMLL3/4 did not result in any  
4 noticeable disturbances in oogenesis, despite critically impairing the entry into  
5 embryogenesis. The fact that dMLL3/4 is dispensable for morphologically  
6 normal oogenesis contrasts with previous observations for other SET domain  
7 histone methyltransferases across different species [19-22].

8

9 **dMLL3/4 is required for the reprogramming of the paternal genome at**  
10 **fertilization**

11 Why do dMLL3/4-depleted eggs fail to enter embryogenesis? We observed that  
12 the depletion of this chromatin remodeler during oogenesis blocks the  
13 reprogramming of the paternal genome after fertilization (**Fig. 2A**). More  
14 specifically, after being mated with wild-type males, more than 90% of all eggs  
15 laid by dMLL3/4-depleted females are unable to convert the tightly compacted  
16 sperm-borne paternal genome into the decondensed chromatin of the paternal  
17 pronucleus (PN; n= 36 and 51, for the RNAi and *dml3/4*<sup>-/-</sup> groups, respectively).  
18 Indeed, in the absence of dMLL3/4, the sperm genome retains its compact  
19 needle-like shape after fertilization, whereas this configuration is rapidly  
20 converted into a round decondensed structure in controls (**Fig. 2A**). Given the  
21 extremely fast kinetics of *Drosophila* sperm decondensation (in normal  
22 conditions the first zygotic division occurs just 15 minutes after sperm entry)  
23 [23], the previously reported *sra*<sup>-/-</sup> mutant (*sra*<sup>A108</sup>/*sra*<sup>A426</sup>) was used as control  
24 [24]. In this egg activation mutant, the reprogramming of the sperm-borne

1 genome is blocked immediately after decondensation. Consequently, in  
2 fertilized eggs from this genetic background, the paternal genome remains  
3 arrested in the shape of the decondensed male PN (**Fig. 2A**).

4 To understand why the sperm-borne paternal genome fails to be decondensed  
5 in dMLL3/4-depleted eggs, RNAi females were mated with males carrying  
6 endogenously fluorescent protamine B (ProtB-GFP) [25]. Protamine B is one of  
7 the major nuclear proteins incorporated into sperm DNA during  
8 spermatogenesis, and the formation of the decondensed paternal PN after  
9 fertilization requires its active removal (alongside other basic nuclear proteins)  
10 from the sperm-borne genome [26]. We observed that the depletion of dMLL3/4  
11 during oogenesis resulted in eggs incapable of ensuring protamine removal  
12 after fertilization (**Fig. 2B**). Indeed, in more than 90% of the fertilized eggs laid  
13 by dMLL3/4-depleted females, paternal chromatin retained the ProtB-GFP  
14 fluorescent signal (n= 44 and 34, for the RNAi and *dmll3/4*<sup>-/-</sup> groups,  
15 respectively). In contrast, no ProtB-GFP signal was ever recorded in the control  
16 (*sra*<sup>-/-</sup> mutant; n= 43; **Fig. 2B**). Similar to our experiments with wild-type sperm,  
17 the genome of ProtB-GFP sperm also remained in a compact configuration in  
18 dMLL3/4-depleted eggs, while it was extensively decondensed in controls.

19 Based on these observations, we conclude that the expression of dMLL3/4  
20 during oogenesis confers oocytes the ability to decondense the paternal  
21 genome after fertilization. The functional basis of this ability resides in the  
22 removal of DNA-compacting nuclear proteins from the sperm-borne chromatin.

23

24 **dMLL3/4 is required for maternal meiotic completion**



1 We found that the role of dMLL3/4 in post-fertilization development went beyond  
2 the decondensation of the paternal genome. In fact, dMLL3/4 was also required  
3 for the successful completion of female meiosis. Meiotic completion is an  
4 essential aspect of the oocyte-to-embryo transition: it erases the cell cycle stage  
5 asymmetry between the maternal and paternal genomes at fertilization. A  
6 particularity of female meiosis is that out of the four resulting haploid nuclei, only  
7 one will contribute to the next generation [27]. All three remaining nuclei (known  
8 as polar bodies - PBs) eventually degenerate. In *Drosophila*, these three nuclei  
9 fuse, after DNA replication, in the cytoplasm of the egg [28,29]. The condensed  
10 chromosomes of this single PB organize into a characteristic rosette shape,  
11 commonly used as readout for successful meiotic completion (**Fig. 2C**) [30].  
12 dMLL3/4 depletion critically impaired the formation of a normal PB rosette. This  
13 PB configuration - indicative of normal meiotic completion - was only detected in  
14 less than 10% of all dMLL3/4-depleted eggs (n= 20 and 10, for the RNAi and  
15 *dml3/4*<sup>-/-</sup> groups, respectively). In all other cases, PB chromatin was severely  
16 affected: chromosomes often collapsed into an indistinct chromatin mass  
17 (clumping), failed to properly assemble into a rosette (scattering), or were  
18 outright dispersed in the cytoplasm of the egg (fragmentation; **Fig. 2C**). Despite  
19 these obvious meiotic defects, dMLL3/4-depleted eggs invariably completed  
20 meiosis (**Fig. 2D**). In fact, the formation of structurally abnormal PBs in all  
21 dMLL3/4-depleted eggs confirmed their capability of progressing, upon egg  
22 activation, from the meiotic metaphase arrest to the post-meiotic state (n= 64  
23 and 66, for the RNAi and control groups, respectively). This observation stands

1 in stark contrast with egg activation mutants, such as *sra*<sup>-/-</sup>, which are incapable  
2 of progressing from the meiotic metaphase arrest (**Fig. 2D**) [24,31].

3 Collectively, these observations indicate that the expression of dMLL3/4 during  
4 oogenesis does not interfere with meiotic cell cycle progression but is essential  
5 for the successful completion of female meiosis.

6

### 7 **dMLL3/4 regulates the expression of a functionally coherent gene subset**

8 Having established that dMLL3/4 is required for the correct remodeling of both  
9 the paternal and maternal genomes at fertilization, we next set out to  
10 characterize the mechanistic basis of this requirement. dMLL3/4 is a  
11 transcriptional activator belonging to the TrxG protein family [14,15]. TrxG  
12 complexes promote the expression of developmental genes across multiple  
13 cellular contexts. Therefore, we hypothesized that dMLL3/4 activates, during  
14 oogenesis, the expression of genes that will be later required for post-  
15 fertilization development. To test this hypothesis, we performed a transcriptomic  
16 analysis of dMLL3/4-depleted eggs. Such analysis revealed that the depletion of  
17 dMLL3/4 during oogenesis had a minor effect on the transcriptome: only 1.5%  
18 of the genes were differentially expressed (212 out of 14401; adjusted *p*-value  
19 <0.05; **Fig. 3A**). Consistent with the role of dMLL3/4 as a transcriptional  
20 activator, the majority (69%) of the differently expressed genes were  
21 downregulated (146 downregulated genes, excluding dMLL3/4, vs. 65  
22 upregulated; **Supplementary Table 1**). The subtle transcriptomic imbalance of  
23 dMLL3/4-depleted eggs was associated with an equally moderate impact on  
24 total H3K4 methylation levels in the ovary (**Supplementary Fig. 3**).

1 Further analysis of the dMLL3/4-defined gene expression program revealed  
2 three noteworthy observations. First, the majority (57%) of the dMLL3/4-  
3 activated genes are, under normal conditions, translated at the oocyte-to-  
4 embryo transition. More specifically, by comparing our transcriptomic data with  
5 a previously published ribosome footprinting dataset of activated eggs [32], we  
6 found that 83 out of the 146 downregulated genes were translated at this  
7 transition stage (**Fig. 3B**; **Supplementary Table 1**). Secondly, consistent with  
8 the observed phenotypes, oogenesis-related genes are conspicuously absent  
9 from the dMLL3/4-activated gene expression program (**Fig. 3B**). Accordingly,  
10 the gene ontology (GO) analysis of the 83 dMLL3/4-activated genes translated  
11 at the oocyte-to-embryo transition failed to detect any enrichment for oogenesis-  
12 related processes (such as “female gamete generation” or “female meiosis”)  
13 [33]. On the other hand, embryogenesis-related GO terms (such as  
14 “morphogenesis of embryonic epithelium” and “negative regulation of  
15 transcription from RNAPol II promoter”) stood out from the list of enriched terms.  
16 Thirdly, dMLL3/4 does not regulate the expression of any gene previously  
17 associated with the assembly of the zygotic genome [4,26,30]. In particular, all  
18 known *Drosophila* oocyte-to-embryo transition genes were expressed at levels  
19 similar to controls (**Fig. 3C** and **Supplementary Table 2**).

20 Based on these data, we conclude that dMLL3/4 promotes, during oogenesis,  
21 the expression of a small subset of genes preferentially translated during the  
22 acquisition of embryo fate. Could the deregulation of any of them be responsible  
23 for the incapability of dMLL3/4-depleted eggs to initiate embryogenesis?

24

1 **IDGF4 is a new, dMLL3/4-regulated, oocyte-to-embryo transition gene**

2 To address the functional significance of the transcriptomic defects of dMLL3/4-  
3 depleted eggs, we individually silenced, during oogenesis, the more severely  
4 downregulated genes (**Supplementary Table 3**). By analysing how this  
5 silencing affected female fertility, we identified a new oocyte-to-embryo  
6 transition gene: Imaginal disc growth factor 4 (IDGF4) [34].

7 The female germ line-specific depletion of IDGF4 had a critical impact on  
8 fertility: after mating with wild-type males, none of the eggs laid by IDGF4-  
9 depleted females hatched (n= 572 and 587, for the RNAi and control groups,  
10 respectively; **Fig. 3D**). The reduced expression of IDGF4 in dMLL3/4 RNAi eggs  
11 was confirmed by real-time quantitative reverse transcription PCR (**Fig. 3E**),  
12 and is consistent with the fact that IDGF4 harbours a predicted  
13 Polycomb/Trithorax response element [35]. Importantly, IDGF4 depletion  
14 recapitulated several of the oocyte-to-embryo transition defects of the dMLL3/4  
15 RNAi. More specifically, despite their normal morphology, IDGF4-depleted eggs  
16 failed to initiate the embryo mitotic divisions (n= 150 for each tested group; **Fig.**  
17 **4A**, compare with **Fig. 1C**). In addition, these eggs had maternal meiotic  
18 completion defects equivalent to those observed in the dMLL3/4 RNAi. Such  
19 defects were illustrated by the clumping, scattering or outright fragmentation of  
20 PB chromosomes (n= 20 per group; **Fig. 4B**, compare with **Fig. 2C**).

21 IDGF4 is one of the six members of the IDGF family of glycosyl hydrolases  
22 [34,36]. IDGFs are required for insulin-dependent cell proliferation, polarization  
23 and motility. Their activity has also been linked to developmental processes  
24 such as extracellular matrix formation, innate immunity, wound healing and

1 tissue morphogenesis [37-39]. We observed that IDGF4 is essential for the  
2 transition from the meiotic to the mitotic program at fertilization. Indeed, most  
3 (78%) IDGF4-depleted eggs assembled zygotic chromatin but were incapable  
4 of initiating mitosis (n= 100 for each tested group; **Fig. 4C**). This pre-mitotic  
5 arrest was consistent with barely detectable levels of histone H3 serine 10  
6 phosphorylation (pSer10 H3, a marker of chromosome condensation) in zygotic  
7 chromatin (n= 20 for each tested group; **Fig. 4D**) [40]. Notably, not only pSer10  
8 H3 was abundantly detected in the polar bodies of the same embryos, but also  
9 the levels of acetylated histone H4 in zygotic chromatin were high (n= 20 for  
10 each tested group; **Fig. 4E**). Both observations strongly suggest that the low  
11 pSer10 H3 zygotic signal of IDGF4-depleted embryos specifically reflects a  
12 mitotic entry defect rather than a generalized deregulation of the post-  
13 fertilization epigenome.

14 In summary, these data support the notion that IDGF4 is a new, dMLL3/4-  
15 regulated, oocyte-to-embryo transition gene. Such observation validates the  
16 instructive role of dMLL3/4 in the acquisition of embryo fate.

17

## 18 **CONCLUSIONS**

19 According to our model, dMLL3/4 regulates, during oocyte development, the  
20 expression of a small gene repertoire that is required for the acquisition of  
21 embryo fate (**Fig. 5**). Such regulation may have evolved to better accommodate  
22 the expression of specific maternal effect genes within the general  
23 transcriptional program of oogenesis. dMLL3/4-mediated gene expression can  
24 thus be considered an additional regulatory layer in the complex orchestration

1 of the oocyte-to-embryo transition. Although this transition is largely dependent  
2 on the profound posttranscriptional changes taking place at egg activation  
3 [32,41,42], our observations emphasize the importance of germ cell  
4 transcriptional regulation in the acquisition of embryo fate.

5 How does dMLL3/4 regulate transcription during oogenesis? Despite containing  
6 a H3K4 methyltransferase domain, the catalytic activity of dMLL3/4 has been  
7 shown to be dispensable, in unperturbed conditions, for development, viability  
8 and fertility [13]. dMLL3/4 is part of an evolutionarily-conserved multiprotein  
9 complex (dMLL3/4-COMPASS) that localizes to enhancer regions of the  
10 genome [14,15]. We envisage that enhancers for specific maternal effect genes  
11 have a distinct chromatin environment amenable to the binding of dMLL3/4-  
12 COMPASS. The possibility that specific gene subsets harbor a defined  
13 epigenetic signature in germ cells is not without precedent. Indeed, key  
14 developmental genes have been previously shown to be maintained in a poised  
15 epigenetic state in mouse germ cells [43]. Quite fittingly, such epigenetic state is  
16 believed to serve as a priming mechanism for the acquisition of totipotency  
17 following fertilization [44].

18 Previous observations suggest that it is the binding at enhancers and not the  
19 catalytic activity of dMLL3/4 that is essential for the activation of gene  
20 expression. More specifically, in mouse embryonic stem cell (mESC) lines, the  
21 recruitment of RNA polymerase II and enhancer RNA synthesis are drastically  
22 reduced in the absence of MLL3 and MLL4, but marginally affected in a catalytic  
23 dead condition [45]. The dispensable nature of dMLL3/4-mediated methylation  
24 is particularly evident in the female germ line, as our results indicate that total

1 H3K4 methylation levels in the ovary remain largely unchanged in the absence  
2 of dMLL3/4. More recently, it has been proposed, also in mESC lines, that the  
3 catalytic activity of MLL3 and MLL4 may in fact facilitate the binding of  
4 additional chromatin remodelers to enhancers [46]. Collectively, these  
5 observations illustrate the multi-layered role of dMLL3/4-COMPASS in gene  
6 expression regulation. A better understanding of such role may be of  
7 significance in the context of complex human diseases such as infertility.

8 Two other TrxG proteins are known to confer oocytes the capability of  
9 sustaining post-fertilization development. MLL2 is required during mammalian  
10 oogenesis for the subsequent activation of the zygotic genome [20], and we and  
11 others have shown that the depletion of dKDM5 in developing *Drosophila*  
12 oocytes impairs early embryo development [30,32]. By adding dMLL3/4 to this  
13 list, our work underlines the importance of TrxG proteins in the transition to  
14 totipotency. In this sense, modulating the expression of TrxG proteins, such as  
15 MLL3/4, during somatic cell reprogramming might increase the overall efficiency  
16 of this technique. An analogous approach targeting one of the vertebrate  
17 orthologs of dKDM5 has already been shown to improve the development of  
18 nuclear transfer embryos [47].

19 The relevance of our findings may even extend to assisted reproduction. We  
20 observed that the dMLL3/4-regulated glycosyl hydrolase IDGF4 has a mitogenic  
21 effect on the early embryo. The mammalian ortholog of IDGF4 is OVGP1, also  
22 known as oviductal glycoprotein 1 [36]. OVGP1 localizes to the oviduct – the  
23 site of mammalian fertilization – where it has been shown to be a component of  
24 the extracellular matrix of ovulated oocytes and early embryos [48,49]. Despite

1 being important for fertilization and early embryogenesis across different  
2 mammalian species, the exact function of OVGP1 remains elusive [50].  
3 Accordingly, OVGP1 has been associated with processes as wide-ranging as  
4 sperm capacitation and blastocyst formation [51-53]. Our results indicate that  
5 the activation of embryo mitotic divisions is the critical function of  
6 IDGF4/OVGP1. Given that IDGF4 has been linked to the acquisition of cellular  
7 responsiveness to signaling cues [54], this glycoprotein may be involved in the  
8 transduction of fertilization-dependent signals required by the embryo mitotic  
9 cascade. In this context, the supplementation of human *in vitro* fertilization (IVF)  
10 culture media with OVGP1 may ultimately increase the developmental potential  
11 of fertilized oocytes. Indeed, the addition of this extracellular glycoprotein to IVF  
12 media has been shown to significantly improve early embryo development rates  
13 in several livestock species [55,56]. Bridging such result to the clinical setting  
14 could represent an important advance in human assisted reproduction  
15 techniques.

16

## 17 **METHODS**

18

19 No statistical methods were used to predetermine sample size. Ovary imaging  
20 and prophase I oocyte chromatin analysis experiments were intentionally  
21 randomized, and the investigators blinded to allocation during experiments and  
22 outcome assessment.

23

### 24 ***Drosophila* rearing conditions**



1 *Drosophila melanogaster* flies were raised at 25°C in polypropylene vials (51  
2 mm diameter) containing enriched medium (cornmeal, molasses, yeast, soya  
3 flour and beetroot syrup). For ovary analysis, flies were transferred, 24h prior to  
4 being tested, to polystyrene vials (23.5 mm diameter) containing standard  
5 medium (cornmeal, molasses, yeast and sucrose). For embryo analysis, flies  
6 were transferred 48h before testing to egg laying cages (with 60 mm diameter  
7 apple juice agar plates). In both cases, fresh yeast paste was provided. Tested  
8 flies were collected 3 to 7 days post-eclosion. All females under analysis were  
9 kept with wild type males (Oregon-R) except when they were mated with ProtB-  
10 GFP males to assess paternal genome reprogramming at fertilization.

11

## 12 **Germ line-specific RNAi**

13 The Gal4-UASp system was used to silence genes of interest specifically in the  
14 female germ line [57,58]. In all reported experiments the silencing was induced  
15 from early oogenesis (germ line stem cell) to the mature egg stage, using the  
16 well-established *nos*-GAL4 driver [59]. dMLL3/4 was silenced using a publically  
17 available UASp-RNAi line (Bloomington stock no. 36916). For the list of UASp-  
18 RNAi lines against dMLL3/4-regulated genes, please consult **Supplementary**  
19 **Table 3**. As controls, the RNAi response was induced, by *nos*-GAL4, against a  
20 sequence not present in the genome of the tested flies (mCherry fluorophore;  
21 Bloomington stock no. 35785). For the male fertility tests, selected genes were  
22 specifically silenced in the male germ line using *bam*-GAL4, a well-  
23 characterized spermatogenesis driver [60].

24

## 1 **Maternal mutant generation**

2 The previously published embryonic lethal *trr*<sup>1</sup> null allele was used to generate  
3 *dml13/4*<sup>-/-</sup> maternal mutant embryos [18]. For this, the FLP/FRT *Ovo*<sup>D</sup>  
4 recombination system was employed [61,62]. Briefly, *Ovo*<sup>D</sup>, *FRT101/Y*; *FLP38*  
5 males (Bloomington stock no. 1813) were crossed to *trr*<sup>1</sup>, *FRT101/FM7* females.  
6 Recombination was induced by heat shocking third instar larvae for 1 hour at  
7 37°C. For controls, recombination was induced using *FRT101* females  
8 (Bloomington stock no. 1844).

9

## 10 **Additional *Drosophila* strains**

11 Two previously published loss of function alleles affecting the *Drosophila*  
12 calcipressin gene *sarah* (*sra*<sup>A108</sup> and *sra*<sup>A426</sup>) were used to generate the *sra*<sup>-/-</sup>  
13 egg activation mutant (*sra*<sup>A108</sup>/*sra*<sup>A426</sup> transheterozygote) [24]. The  
14 reprogramming of the paternal genome after fertilization was tested by mating  
15 females under analysis with ProtB-GFP males carrying a fusion of Protamine B  
16 with enhanced green fluorescent protein (*Sp/CyO*; *ProtB-GFP*) [25]. An UASp  
17 fly stock carrying a double stranded RNA against an essential gene (the  
18 spliceosome subunit Prp19) was used as positive control for spermatogenesis  
19 phenotypes [63].

20

## 21 **Antibodies**

22 The following primary antibodies were used for immunofluorescence: mouse  
23 anti- $\alpha$ -Tubulin (1:500 dilution, Sigma T9026); mouse anti-Orb (clones 4H8 and  
24 6H4, 1:30 dilution each, Developmental Studies Hybridoma Bank); rabbit anti-

1 pSer10 H3 (1:500 dilution, Upstate 06-570) and rabbit anti-H4ac (1:500 dilution,  
2 Millipore 06-866). The following primary antibodies were used for  
3 immunoblotting: rabbit anti-dMLL3/4 (1:1000 dilution, from both the Alexander  
4 Mazo and Ali Shilatifard labs) [11,12]; rabbit anti-H3K4me1 (1:5000 dilution,  
5 Active Motif 39298); rabbit anti-H3K4me2 (1:5000 dilution, Active Motif 39142);  
6 rabbit anti-H3K4me3 (1:500 dilution, Active Motif 39160); rabbit anti-H3 (1:8000  
7 dilution, Cell Signalling Technology #9715) and mouse anti- $\alpha$ -Tubulin (1:50000  
8 dilution, Sigma T6199).

9 Secondary detection was performed with Cy3, Cy5 and HRP-conjugated  
10 antibodies at 1:1000 (immunofluorescence) and 1:4000 (immunoblotting)  
11 dilutions (Jackson ImmunoResearch).

12

### 13 **Protein immunoblotting**

14 Maternal protein extracts were prepared from pre-zygotic genome activation  
15 (ZGA) embryos as previously described [30,63]. Briefly, early embryos (less  
16 than 1 hour post-laying) were dechorionated with a 50% commercial bleach  
17 solution and manually selected for the lack of morphological hallmarks of a  
18 post-ZGA state (selection for the absence of pole cells and cortical nuclei).

19 Maternal protein extracts were obtained by lysing the embryos with a needle in  
20 Laemmli sample buffer and heating for 5 minutes at 100°C. Fifteen embryos  
21 were selected per genotype per experiment. Ovary protein extracts were  
22 enriched for core histones using a histone purification mini kit (Active Motif).  
23 Twenty ovary pairs were included per sample.

1 Protein samples were run on 6% or 15% SDS-PAGE gels (for dMLL3/4 and  
2 H3K4 methylation analysis, respectively) and transferred to nitrocellulose  
3 membranes (Amersham) for one hour at 100V. Membranes were blocked for  
4 one hour at room temperature in 5% non-fat milk in PBS-T [0.1% Tween 20 in  
5 PBS (both from Sigma-Aldrich)], followed by an overnight incubation with the  
6 primary antibody (at 4°C) in 1% non-fat milk in PBS-T. After washing,  
7 membranes were blocked for 15 minutes in 5% non-fat milk in PBS-T and then  
8 incubated for 2 hours (at room temperature) with the secondary antibody in 1%  
9 non-fat milk in PBS-T. Following another round of washing, membranes were  
10 incubated with ECL solution for 1 minute. Protein detection was performed  
11 using a ECL Hyperfilm (Amersham). A minimum of two independent  
12 experiments was conducted for each experimental condition.

13

#### 14 **Fertility tests**

15 Fertility was tested as previously described [30]. In either male or female fertility  
16 tests, egg laying cages with 20 females and 10 males were maintained at 25°C  
17 for 48 hours prior to analysis. Tested genotypes were mated with a wild type  
18 strain (Oregon-R). All flies were 3 to 7 days post-eclosion and analyses were  
19 performed on two consecutive days. Laid eggs were collected for 30 minutes in  
20 apple juice agar plates and further incubated for 48 hours at 25°C. The total  
21 number of eggs and the number of hatched eggs were recorded upon collection  
22 and 48 hours afterwards, respectively. Fertility rate was determined as the  
23 number of hatched eggs divided by the total number of eggs. Four independent  
24 experiments were conducted for each experimental condition.

1

## 2 **Embryo imaging**

3 Egg laying cages with 40 females and approximately 20 males were maintained  
4 at 25°C for 48 hours prior to analysis. Embryos were collected in apple juice  
5 agar plates (up to 30 minutes after egg laying) and immediately processed.  
6 Collection times went up to 1 hour after egg laying followed by 2 additional  
7 hours of incubation at 25°C when assessing entry into embryogenesis. Embryo  
8 processing started with dechoriation in a 50% commercial bleach solution.  
9 Embryos were then fixed and devitellinized in a 1:1 heptane-methanol mix for 5  
10 minutes with shaking. Following rehydration, embryos were stained as  
11 previously described [64]. Briefly, embryos were blocked for 1 hour in BBT  
12 [PBS-T supplemented with 1% (w/v) bovine serum albumin and 1% (w/v)  
13 donkey serum (both from Sigma-Aldrich)]. Primary antibody incubation was  
14 performed overnight at 4°C in BBT. After washing, embryos were incubated in  
15 the secondary antibody solution (in BBT, for 1 hour at room temperature). DNA  
16 was stained either with SYTOX Green (Invitrogen) or Hoechst 33342 (Thermo  
17 Fisher). For SYTOX Green, embryos were incubated for 30 minutes in a 1:5000  
18 dilution in PBS-T supplemented with 5 µg/ml RNase A (Sigma-Aldrich). For  
19 Hoechst 33342, the incubation time for a 5 µg/ml solution in PBS-T was 10  
20 minutes. Embryos were mounted in fluorescence mounting medium (Dako) and  
21 images were acquired with either a 40x HCX PL APO CS oil immersion  
22 objective (numerical aperture: 1.25-0.75) or a 63x HCX PL APO oil immersion  
23 objective (numerical aperture: 1.40-0.60) on a Leica SP5 confocal microscope.  
24 Four independent experiments were conducted for each experimental condition.

1 For the measurement of mature eggs, these were photographed (after a one  
2 hour collection) using a camera-coupled Leica MZ12.5 stereomicroscope (Plan  
3 APO 1.0x objective, amplification: 64x). Egg size corresponds to the length of  
4 its main axis, as measured using the ImageJ software (v1.48i; National  
5 Institutes of Health). Since this experiment (**Fig. 1D**) was part of a larger  
6 dataset, the quantification of the control group has already been published [30].

7

### 8 **Ovary imaging**

9 Adult ovaries (10 ovary pairs per sample per experiment) were processed as  
10 previously described [30]. Briefly, ovaries were dissected in PBS and fixed for  
11 20 min in a heptane-fixative mix at 3:1. The fixative consisted of 4%  
12 formaldehyde (Polysciences) in a PBS + 0.5% NP-40 (Sigma-Aldrich) solution.  
13 The ovarioles were partly detached, and ovaries were incubated for 2 hours in  
14 PBS-T (0.2% Tween 20) supplemented with 1% Triton X-100 (Sigma-Aldrich),  
15 1% (w/v) bovine serum albumin and 1% (w/v) donkey serum. Primary antibody  
16 incubation was performed overnight at 4°C in BBT. The following day, ovaries  
17 were washed and incubated for 1 hour at room temperature in the secondary  
18 antibody solution (in BBT). Filamentous actin (f-Act) was stained with phalloidin-  
19 TRITC (Sigma-Aldrich) at 1:200 in PBS-T for 20 minutes. DNA was stained with  
20 SYTOX Green and the ovaries were mounted in fluorescence mounting  
21 medium. Fluorescence images were acquired with the previously described set-  
22 up (see “Embryo immunofluorescence”). Four independent experiments were  
23 conducted for each experimental condition and the analysis was performed in a  
24 blinded fashion.

1 For the bright-field imaging of whole ovaries, these were photographed after  
2 fixation using a camera-coupled Leica MZ12.5 stereomicroscope.

3

#### 4 **Meiotic metaphase I arrest analysis**

5 A protocol preventing egg activation was used to analyze the true metaphase I  
6 arrest configuration of the mature *Drosophila* female gamete [30,65]. Briefly,  
7 virgin females were aged, in the absence of males, for 4 days in standard  
8 medium supplemented with fresh yeast paste. Ovaries (10 pairs per sample per  
9 experiment) were quickly dissected in modified Robb's medium and immediately  
10 transferred to fixative (4% formaldehyde in Robb's medium). After a 5 minute  
11 incubation, ovaries were washed and DNA was stained with SYTOX Green.  
12 Two independent experiments were conducted for each experimental condition.  
13 Since this experiment (**Fig. 1F**) was part of a larger dataset, the quantification of  
14 the control group has already been published [30].

15

#### 16 **Prophase I oocyte chromatin architecture analysis**

17 The entire chromatin volume of individual prophase I oocytes was acquired as  
18 0.5  $\mu\text{m}$ -thick slices using a Leica SP5 confocal microscope (in fluorescence  
19 mounting medium). Two developmental stages were selected: before and after  
20 the establishment of the prophase I arrest (stages 1 and 6, respectively). Orb  
21 staining was used to unequivocally distinguish stage 1 oocytes from other  
22 neighbouring cells. Slices were stacked into maximum intensity Z-projections  
23 and binarized using an automated global thresholding method (Li's minimum  
24 cross entropy thresholding; ImageJ). The perimeter of the binarized chromatin

1 signal was then measured. Two independent experiments were conducted for  
2 each experimental condition and the analysis was performed in a blinded  
3 fashion.

4

#### 5 **Embryo gene expression analysis**

6 After manual isolation of pre-ZGA embryos (see “Protein immunoblotting”), total  
7 RNA was extracted using the PureLink RNA Mini Kit (Ambion). Total RNA was  
8 then processed for hybridization onto Drosophila Gene 1.1 ST Array Strip  
9 (Affymetrix) according to manufacturer’s instructions. For this, a GeneChip WT  
10 PLUS Reagent Kit (Affymetrix) and a GeneAtlas Hybridization, Wash and Stain  
11 Kit for WT Array Strips (Affymetrix) were used. One hundred nanograms of total  
12 RNA containing spiked in Poly-A RNA controls (GeneChip Poly-A RNA Control  
13 Kit, Affymetrix) were reverse transcribed for synthesis of single-stranded cDNA.  
14 After second-strand synthesis, the obtained double-stranded cDNA served as  
15 template for an *in vitro* transcription reaction to generate amplified cRNA.  
16 Fifteen micrograms of purified cRNA were then used for a second cycle of  
17 single-strand cDNA synthesis, after which 5.5 µg of ss-cDNA was fragmented  
18 and end-labeled. During this process, checkpoints for purity as well as integrity  
19 and size distribution of cRNA and fragmented ss-cDNA were performed using  
20 NanoDrop 1000 Spectrophotometer and Bioanalyzer 2100, respectively. Finally,  
21 3.5 µg of the amplified, fragmented and labeled ss-cDNA were prepared in a  
22 150 µl hybridization cocktail (containing hybridization controls) and 120 µl were  
23 used for the hybridization. The array strips were subsequently washed, double-



1 stained and scanned. The hybridization, washing and scanning were performed  
2 using the Affymetrix GeneAtlas System.  
3 The expression level of selected transcripts was validated by real-time  
4 quantitative reverse transcription PCR (qRT-PCR). Total RNA was extracted as  
5 before and 1  $\mu$ g was used for reverse transcription with Oligo(dT)<sub>18</sub> primers  
6 (Transcriptor First Strand cDNA Synthesis Kit, Roche). qRT-PCR was  
7 performed under standard conditions using the Power SYBR Green PCR  
8 Master Mix (Applied Biosystems) in an ABI QuantStudio 7 station (Applied  
9 Biosystems). Samples were normalized using the expression of the Ribosomal  
10 protein L32 (*RpL32*) housekeeping gene. Relative expression levels were  
11 calculated with the  $2^{-\Delta\Delta C_T}$  method, as previously described [66]. Primers were  
12 designed with Primer-BLAST (<https://www.ncbi.nlm.nih.gov/tools/primer-blast/>)  
13 and the corresponding sequences can be found in **Supplementary Table 4**.  
14 For both the microarray and qRT-PCR analyses, two temporally independent  
15 experiments were conducted for each experimental condition.

16

### 17 **Embryo chromatin signal quantification**

18 The entire volume of zygotic (cycle 1 or cycles 4 to 6) and polar body chromatin  
19 was acquired as 1  $\mu$ m-thick slices using a Leica SP5 confocal microscope.  
20 Slices corresponding to each nucleus were stacked into a single maximum  
21 intensity Z-projection using ImageJ, and the limits of the chromatin area were  
22 defined. The mean fluorescence value of the tested signals was then recorded  
23 in arbitrary units (AU) inside the defined area, alongside that of a background  
24 reading. Relative signals were calculated as the mean fluorescence of the

1 chromatin signal divided by the mean fluorescence of the corresponding  
2 background. A minimum of three independent experiments was conducted for  
3 each experimental condition.

4

### 5 **Statistical analysis**

6 The scanned arrays were analyzed with Affymetrix Expression Console  
7 software using Robust Multi-array Analysis for both quality control and to obtain  
8 expression values. Control probe sets were removed and log<sub>2</sub> expression  
9 values of the remaining 15308 transcripts were imported into Chipster 3.8.1  
10 [67]. Differential expression was determined by empirical Bayes two-group test  
11 with Benjamini-Hochberg multiple testing correction and a p-value cut-off of 0.05  
12 [68].

13 Gene Ontology analysis was performed using the Metascape Gene Annotation  
14 and Analysis Resource tool (<http://metascape.org/gp/index.html#/main/step1>)  
15 using the “express analysis” settings [69].

16 Nonparametric tests (Mann-Whitney U test) were used to compare egg size,  
17 relative fluorescence signals and chromatin perimeter measurements between  
18 groups. For egg eclosion and mitotic entry rates, unpaired (two sample) t-tests  
19 were used. The comparison of male PN configuration, sperm ProtB-GFP signal,  
20 meiotic completion, MI arrest configuration and early zygotic development  
21 between groups was performed by two-way ANOVA. Reported *P* values  
22 correspond to two-tailed tests. All analyses were performed using Prism 7  
23 software (GraphPad).

24

## 1 **Data availability**

2 All relevant data and reagents are available from the Authors. The microarray  
3 data discussed in this publication have been deposited in NCBI's Gene  
4 Expression Omnibus [70] and are accessible through GEO Series accession  
5 number GSE108033  
6 (<https://www.ncbi.nlm.nih.gov/geo/query/acc.cgi?acc=GSE108033>).

7

## 8 **ACKNOWLEDGEMENTS**

9 The authors wish to thank Gabriel Martins and Nuno Pimpão for assistance in  
10 fluorescence microscopy. We acknowledge Renate Renkawitz-Pohl (Philipps-  
11 Universität Marburg, Germany) and Mariana Wolfner (Cornell University, Ithaca,  
12 USA) for kindly providing us with the ProtB-GFP and *sarah* mutant fly stocks,  
13 respectively. We also thank Alexander Mazo (Thomas Jefferson University,  
14 Philadelphia, USA) and Ali Shilatifard (Northwestern University Feinberg School  
15 of Medicine, Chicago, USA) for aliquots of an anti-dMLL3/4 antibody. We  
16 acknowledge the TRiP at Harvard Medical School (NIH/NIGMS R01-  
17 GM084947) for providing several of the transgenic RNAi fly stocks used in this  
18 study. Rui G. Martinho is supported by Portuguese national funding through the  
19 following Fundação para a Ciência e a Tecnologia (FCT) grants: PTDC/BEX-  
20 BID/0395/2014 and UID/BIM/04773/2013 CBMR 1334. Jörg D. Becker received  
21 salary support from FCT through an “Investigador FCT” position  
22 (IF/01341/2012). Paulo Navarro-Costa is supported by a FCT Postdoctoral  
23 fellowship (SFRH/BPD/84214/2012).

24

1 **AUTHORS CONTRIBUTIONS**

2 P.P.: Investigation. L.G.G.: Investigation. J.S.: Investigation. J.D.B.:  
3 Investigation, Writing (review & editing). R.G.M: Conceptualization, Writing  
4 (review & editing), Funding acquisition. P.N-C: Conceptualization, Investigation,  
5 Writing (original draft + review & editing).

6

7 **CONFLICT OF INTEREST STATEMENT**

8 The authors declare that they have no conflict of interest.

## 1 REFERENCES

2

- 3 1. Clift D, Schuh M (2013) Restarting life: fertilization and the transition from  
4 meiosis to mitosis. *Nat Rev Mol Cell Biol* **14**: 549–562.
- 5 2. Morgan HD, Santos F, Green K, Dean W, Reik W (2005) Epigenetic  
6 reprogramming in mammals. *Hum Mol Genet* **14 Spec No 1**: R47–R58.
- 7 3. Burton A, Torres-Padilla M-E (2014) Chromatin dynamics in the regulation  
8 of cell fate allocation during early embryogenesis. *Nat Rev Mol Cell Biol*  
9 **15**: 723–734.
- 10 4. Loppin B, Dubruille R, Horard B (2015) The intimate genetics of  
11 *Drosophila* fertilization. *Open Biol* **5**: 150076.
- 12 5. Albert M, Peters AHFM (2009) Genetic and epigenetic control of early  
13 mouse development. *Curr Opin Genet Dev* **19**: 113–121.
- 14 6. Lipshitz HD (2015) *The Maternal-to-Zygotic Transition*. Academic Press.
- 15 7. Johnston DS, Nüsslein-Volhard C (1992) The origin of pattern and polarity  
16 in the *Drosophila* embryo. *Cell* **68**: 201–219.
- 17 8. Li L, Zheng P, Dean J (2010) Maternal control of early mouse  
18 development. *Development* **137**: 859–870.
- 19 9. Wang C, Lee J-E, Lai B, Macfarlan TS, Xu S, Zhuang L, Liu C, Peng W,  
20 Ge K (2016) Enhancer priming by H3K4 methyltransferase MLL4 controls  
21 cell fate transition. *Proc Natl Acad Sci USA* **113**: 11871–11876.
- 22 10. Andreu-Vieyra C, Matzuk MM (2007) Epigenetic modifications by  
23 Trithorax group proteins during early embryogenesis: do members of Trx-  
24 G function as maternal effect genes? *Reprod Biomed Online* **14**: 201–  
25 207.
- 26 11. Sedkov Y, Cho E, Petruk S, Cherbas L, Smith ST, Jones RS, Cherbas P,  
27 Canaani E, Jaynes JB, Mazo A (2003) Methylation at lysine 4 of histone  
28 H3 in ecdysone-dependent development of *Drosophila*. *Nature* **426**: 78–  
29 83.
- 30 12. Herz HM, Mohan M, Garruss AS, Liang K, Takahashi YH, Mickey K,  
31 Voets O, Verrijzer CP, Shilatifard A (2012) Enhancer-associated H3K4  
32 monomethylation by Trithorax-related, the *Drosophila* homolog of  
33 mammalian Mll3/Mll4. *Genes Dev* **26**: 2604–2620.
- 34 13. Rickels R, Herz H-M, Sze CC, Cao K, Morgan MA, Collings CK, Gause M,  
35 Takahashi Y-H, Wang L, Rendleman EJ, et al. (2017) Histone H3K4  
36 monomethylation catalyzed by Trr and mammalian COMPASS-like  
37 proteins at enhancers is dispensable for development and viability. *Nat*  
38 *Genet* **49**: 1647–1653.
- 39 14. Schuettengruber B, Bourbon H-M, Di Croce L, Cavalli G (2017) Genome  
40 Regulation by Polycomb and Trithorax: 70 Years and Counting. *Cell* **171**:  
41 34–57.
- 42 15. Piunti A, Shilatifard A (2016) Epigenetic balance of gene expression by  
43 Polycomb and COMPASS families. *Science* **352**: aad9780.
- 44 16. Tan YC, Chow VT (2001) Novel human HALR (MLL3) gene encodes a  
45 protein homologous to ALR and to ALL-1 involved in leukemia, and maps  
46 to chromosome 7q36 associated with leukemia and developmental

- 1 defects. *Cancer Detect Prev* **25**: 454–469.
- 2 17. FitzGerald KT, Diaz MO (1999) MLL2: A new mammalian member of the  
3 trx/MLL family of genes. *Genomics* **59**: 187–192.
- 4 18. Sedkov Y, Benes JJ, Berger JR, Riker KM, Tillib S, Jones RS, Mazo A  
5 (1999) Molecular genetic analysis of the *Drosophila* trithorax-related gene  
6 which encodes a novel SET domain protein. *Mech Dev* **82**: 171–179.
- 7 19. Brici D, Zhang Q, Reinhardt S, Dahl A, Hartmann H, Schmidt K, Goveas  
8 N, Huang J, Gahurova L, Kelsey G, et al. (2017) The histone 3 lysine 4  
9 methyltransferase Setd1bis a maternal effect gene required for the  
10 oogenic gene expression program. *Development* dev.143347–44.
- 11 20. Andreu-Vieyra CV, Chen R, Agno JE, Glaser S, Anastassiadis K, Stewart  
12 AF, Matzuk MM (2010) MLL2 Is Required in Oocytes for Bulk Histone 3  
13 Lysine 4 Trimethylation and Transcriptional Silencing. *PLoS Biol* **8**:  
14 e1000453–19.
- 15 21. Yan D, Neumüller RA, Buckner M, Ayers K, Li H, Hu Y, Yang-Zhou D,  
16 Pan L, Wang X, Kelley C, et al. (2014) A Regulatory Network of  
17 *Drosophila* Germline Stem Cell Self-Renewal. *Dev Cell* **28**: 459–473.
- 18 22. Xiao Y, Bedet C, Robert VJP, Simonet T, Dunkelbarger S, Rakotomalala  
19 C, Soete G, Korswagen HC, Strome S, Palladino F (2011) *Caenorhabditis*  
20 *elegans* chromatin-associated proteins SET-2 and ASH-2 are differentially  
21 required for histone H3 Lys 4 methylation in embryos and adult germ  
22 cells. *Proc Natl Acad Sci USA* **108**: 8305–8310.
- 23 23. Foe VF, Odell GM, Edgar BA (1993) Mitosis and morphogenesis in the  
24 *Drosophila* embryo: point and counterpoint. In Bate M, Arias AM (eds.),  
25 *The development of Drosophila melanogaster* pp 149–300.
- 26 24. Horner VL, Czank A, Jang JK, Singh N, Williams BC, Puro J, Kubli E,  
27 Hanes SD, McKim KS, Wolfner MF, et al. (2006) The *Drosophila*  
28 Calcipressin Sarah Is Required for Several Aspects of Egg Activation.  
29 *Curr Biol* **16**: 1441–1446.
- 30 25. Jayaramaiah Raja S, Renkawitz-Pohl R (2005) Replacement by  
31 *Drosophila melanogaster* protamines and Mst77F of histones during  
32 chromatin condensation in late spermatids and role of sesame in the  
33 removal of these proteins from the male pronucleus. *Mol Cell Biol* **25**:  
34 6165–6177.
- 35 26. Tirmarche S, Kimura S, Dubrulle R, Horard B, Loppin B (2016) Unlocking  
36 sperm chromatin at fertilization requires a dedicated egg thioredoxin in  
37 *Drosophila*. *Nat Commun* **7**: 13539.
- 38 27. Li R, Albertini DF (2013) The road to maturation: somatic cell interaction  
39 and self-organization of the mammalian oocyte. *Nat Rev Mol Cell Biol* **14**:  
40 141–152.
- 41 28. Huettner AF (1924) Maturation and fertilization in *Drosophila*  
42 *melanogaster*. *Journal of Morphology* **39**: 249–265.
- 43 29. Page AW, Orr-Weaver TL (1997) Activation of the meiotic divisions in  
44 *Drosophila* oocytes. *Dev Biol* **183**: 195–207.
- 45 30. Navarro-Costa P, McCarthy A, Prudêncio P, Greer C, Guilgur LG, Becker  
46 JD, Secombe J, Rangan P, Martinho RG (2016) Early programming of the  
47 oocyte epigenome temporally controls late prophase I transcription and  
48 chromatin remodelling. *Nat Commun* **7**: 12331.

- 1 31. Takeo S, Tsuda M, Akahori S, Matsuo T, Aigaki T (2006) The Calcineurin  
2 Regulator Sra Plays an Essential Role in Female Meiosis in *Drosophila*.  
3 *Curr Biol* **16**: 1435–1440.
- 4 32. Kronja I, Yuan B, Eichhorn SW, Dzeyk K, Krijgsveld J, Bartel DP, Orr-  
5 Weaver TL (2014) Widespread changes in the posttranscriptional  
6 landscape at the *Drosophila* oocyte-to-embryo transition. *Cell Rep* **7**:  
7 1495–1508.
- 8 33. Baker DA, Russell S (2009) Gene expression during *Drosophila*  
9 melanogaster egg development before and after reproductive diapause.  
10 *BMC Genomics* **10**: 242–16.
- 11 34. Kawamura K, Shibata T, Saget O, Peel D, Bryant PJ (1999) A new family  
12 of growth factors produced by the fat body and active on *Drosophila*  
13 imaginal disc cells. *Development* **126**: 211–219.
- 14 35. Ringrose L, Rehmsmeier M, Dura J-M, Paro R (2003) Genome-wide  
15 prediction of Polycomb/Trithorax response elements in *Drosophila*  
16 melanogaster. *Dev Cell* **5**: 759–771.
- 17 36. Zimmerman SG, Merrihew GE, MacCoss MJ, Berg CA (2017) Proteomics  
18 Analysis Identifies Orthologs of Human Chitinase-Like Proteins as  
19 Inducers of Tube Morphogenesis Defects in *Drosophila melanogaster*.  
20 *Genetics* **206**: 973–984.
- 21 37. Pesch Y-Y, Riedel D, Patil KR, Loch G, Behr M (2016) Chitinases and  
22 Imaginal disc growth factors organize the extracellular matrix formation at  
23 barrier tissues in insects. *Sci Rep* **6**: 18340.
- 24 38. Broz V, Kucerova L, Rouhova L, Fleischmannova J, Strnad H, Bryant PJ,  
25 Zurovec M (2017) *Drosophila* imaginal disc growth factor 2 is a trophic  
26 factor involved in energy balance, detoxification, and innate immunity. *Sci*  
27 *Rep* **7**: 43273.
- 28 39. Kucerova L, Broz V, Arefin B, Maaroufi HO, Hurychova J, Strnad H,  
29 Zurovec M, Theopold U (2016) The *Drosophila* Chitinase-Like Protein  
30 IDGF3 Is Involved in Protection against Nematodes and in Wound  
31 Healing. *J Innate Immun* **8**: 199–210.
- 32 40. Sawicka A, Seiser C (2012) Histone H3 phosphorylation - a versatile  
33 chromatin modification for different occasions. *Biochimie* **94**: 2193–2201.
- 34 41. Krauchunas AR, Wolfner MF (2013) Molecular changes during egg  
35 activation. *Curr Top Dev Biol* **102**: 267–292.
- 36 42. Svoboda P, Franke V, Schultz RM (2015) Sculpting the Transcriptome  
37 During the Oocyte-to-Embryo Transition in Mouse. *Curr Top Dev Biol* **113**:  
38 305–349.
- 39 43. Lesch BJ, Dokshin GA, Young RA, McCarrey JR, Page DC (2013) A set  
40 of genes critical to development is epigenetically poised in mouse germ  
41 cells from fetal stages through completion of meiosis. *Proc Natl Acad Sci*  
42 *USA* **110**: 16061–16066.
- 43 44. Lesch BJ, Page DC (2014) Poised chromatin in the mammalian germ line.  
44 *Development* **141**: 3619–3626.
- 45 45. Dorigi KM, Swigut T, Henriques T, Bhanu NV, Scruggs BS, Nady N, Still  
46 CD, Garcia BA, Adelman K, Wysocka J (2017) Mll3 and Mll4 Facilitate  
47 Enhancer RNA Synthesis and Transcription from Promoters  
48 Independently of H3K4 Monomethylation. *Mol Cell* **66**: 568–576.e4.

- 1 46. Local A, Huang H, Albuquerque CP, Singh N, Lee AY, Wang W, Wang C,  
2 Hsia JE, Shiau AK, Ge K, et al. (2018) Identification of H3K4me1-  
3 associated proteins at mammalian enhancers. *Nat Genet* **50**: 73–82.
- 4 47. Hörmanseder E, Simeone A, Allen GE, Bradshaw CR, Figlmüller M,  
5 Gurdon J, Jullien J (2017) H3K4 Methylation-Dependent Memory of  
6 Somatic Cell Identity Inhibits Reprogramming and Development of  
7 Nuclear Transfer Embryos. *Cell Stem Cell* **21**: 135–143.e136.
- 8 48. Buhi WC (2002) Characterization and biological roles of oviduct-specific,  
9 oestrogen-dependent glycoprotein. *Reproduction* **123**: 355–362.
- 10 49. Gao Y, Liu X, Tang B, Li C, Kou Z, Li L, Liu W, Wu Y, Kou X, Li J, et al.  
11 (2017) Protein Expression Landscape of Mouse Embryos during Pre-  
12 implantation Development. *Cell Rep* **21**: 3957–3969.
- 13 50. Yang X, Zhao Y, Yang X, Kan FWK (2015) Recombinant hamster  
14 oviductin is biologically active and exerts positive effects on sperm  
15 functions and sperm-oocyte binding. *PLoS ONE* **10**: e0123003.
- 16 51. King RS, Anderson SH, Killian GJ (1994) Effect of bovine oviductal  
17 estrus-associated protein on the ability of sperm to capacitate and fertilize  
18 oocytes. *J Androl* **15**: 468–478.
- 19 52. Coy P, Cánovas S, Mondéjar I, Saavedra MD, Romar R, Grullón L, Matás  
20 C, Avilés M (2008) Oviduct-specific glycoprotein and heparin modulate  
21 sperm-zona pellucida interaction during fertilization and contribute to the  
22 control of polyspermy. *Proc Natl Acad Sci USA* **105**: 15809–15814.
- 23 53. Killian GJ (2004) Evidence for the role of oviduct secretions in sperm  
24 function, fertilization and embryo development. *Anim Reprod Sci* **82-83**:  
25 141–153.
- 26 54. Hipfner DR, Cohen SM (1999) New growth factors for imaginal discs.  
27 *BioEssays* **21**: 718–720.
- 28 55. Martus NS, Verhage HG, Mavrogianis PA, Thibodeaux JK (1998)  
29 Enhancement of bovine oocyte fertilization in vitro with a bovine oviductal  
30 specific glycoprotein. *J Reprod Fertil* **113**: 323–329.
- 31 56. Kouba AJ, Abeydeera LR, Alvarez IM, Day BN, Buhi WC (2000) Effects of  
32 the porcine oviduct-specific glycoprotein on fertilization, polyspermy, and  
33 embryonic development in vitro. *Biol Reprod* **63**: 242–250.
- 34 57. Brand AH, Perrimon N (1993) Targeted gene expression as a means of  
35 altering cell fates and generating dominant phenotypes. *Development*  
36 **118**: 401–415.
- 37 58. Ni J-Q, Zhou R, Czech B, Liu L-P, Holderbaum L, Yang-Zhou D, Shim H-  
38 S, Tao R, Handler D, Karpowicz P, et al. (2011) A genome-scale shRNA  
39 resource for transgenic RNAi in *Drosophila*. *Nat Methods* **8**: 405–407.
- 40 59. Van Doren M, Williamson AL, Lehmann R (1998) Regulation of zygotic  
41 gene expression in *Drosophila* primordial germ cells. *Curr Biol* **8**: 243–  
42 246.
- 43 60. White-Cooper H (2012) Tissue, cell type and stage-specific ectopic gene  
44 expression and RNAi induction in the *Drosophila* testis. *Spermatogenesis*  
45 **2**: 11–22.
- 46 61. Chou TB, Perrimon N (1992) Use of a yeast site-specific recombinase to  
47 produce female germline chimeras in *Drosophila*. *Genetics* **131**: 643–653.
- 48 62. Prudêncio P, Guilgur L (2015) FLP/FRT Induction of Mitotic



- 1 Recombination in *Drosophila* Germline. *Bio-protocol* **5**: e1458.
- 2 63. Guilgur LG, Prudêncio P, Sobral D, Liszekova D, Rosa A, Martinho RG  
3 (2014) Requirement for highly efficient pre-mRNA splicing during  
4 *Drosophila* early embryonic development. *eLife* **3**: e02181.
- 5 64. Ribeiro AL, Silva RD, Foyen H, Tiago MN, Rathore OS, Arnesen T,  
6 Martinho RG (2016) Naa50/San-dependent N-terminal acetylation of Scc1  
7 is potentially important for sister chromatid cohesion. *Sci Rep* **6**: 39118.
- 8 65. Gilliland WD, Hughes SF, Vietti DR, Hawley RS (2009) Congression of  
9 achiasmate chromosomes to the metaphase plate in *Drosophila*  
10 *melanogaster* oocytes. *Dev Biol* **325**: 122–128.
- 11 66. Livak KJ, Schmittgen TD (2001) Analysis of relative gene expression data  
12 using real-time quantitative PCR and the 2<sup>-</sup>(Delta Delta C(T)) Method.  
13 *Methods* **25**: 402–408.
- 14 67. Kallio MA, Tuimala JT, Hupponen T, Klemelä P, Gentile M, Scheinin I,  
15 Koski M, Käki J, Korpelainen EI (2011) Chipster: user-friendly analysis  
16 software for microarray and other high-throughput data. *BMC Genomics*  
17 **12**: 507.
- 18 68. Smyth GK (2004) Linear Models and Empirical Bayes Methods for  
19 Assessing Differential Expression in Microarray Experiments. *Stat Appl*  
20 *Genet Mol Biol* **3**: 1–25.
- 21 69. Tripathi S, Pohl MO, Zhou Y, Rodriguez-Frandsen A, Wang G, Stein DA,  
22 Moulton HM, DeJesus P, Che J, Mulder LCF, et al. (2015) Meta- and  
23 Orthogonal Integration of Influenza ‘OMICS’ Data Defines a Role for  
24 UBR4 in Virus Budding. *Cell Host Microbe* **18**: 723–735.
- 25 70. Edgar R, Domrachev M, Lash AE (2002) Gene Expression Omnibus:  
26 NCBI gene expression and hybridization array data repository. *Nucleic*  
27 *Acids Res* **30**: 207–210.
- 28

1 **FIGURE LEGENDS**

2 **Figure 1. dMLL3/4 is essential for entry into embryogenesis but**  
3 **dispensable for oogenesis.**

4 **A.** dMLL3/4 protein levels are strongly reduced both under germ line-specific  
5 RNAi (*nos*-GAL4; UASp-dMLL3/4<sup>RNAi</sup>) and in a *dml3/4*<sup>-/-</sup> mutant (*trr*<sup>1</sup>). ZGA:  
6 zygotic genome activation. The ratio between the dMLL3/4 and  $\alpha$ -tubulin signals  
7 are expressed in arbitrary units (AU). The results of each independent  
8 experiment are plotted, bars specify mean values and horizontal lines the  
9 standard deviation. **B.** dMLL3/4 is essential for female, but not male, fertility.  
10 Error bars represent standard deviation and asterisks indicate significant  
11 difference (unpaired t-test;  $P < 0.0001$ ; NS: no significant difference). Male germ  
12 line driver: *bam*-GAL4; +ve spermatogenesis control: UASp-Prp19<sup>RNAi</sup>. **C.**  
13 dMLL3/4-depleted eggs fail to initiate embryogenesis. The dashed yellow line  
14 delimits the egg's cytoplasm. Unpaired t-test;  $P < 0.0001$ . Scale bar: 10  $\mu$ m. **D.**  
15 dMLL3/4 is dispensable for morphologically normal female gonads and  
16 gametes. Mature egg size is defined by the length of its main axis and is  
17 expressed in millimetres (mm). Quantification of the egg size control group has  
18 already been published [30]. Horizontal lines specify mean values. Mann-  
19 Whitney U test; NS. Scale bars: 500 and 125  $\mu$ m (ovaries and eggs,  
20 respectively). **E.** dMLL3/4 is dispensable for normal ovarian follicle  
21 development. Arrowheads point to the oocyte nucleus. f-Act: filamentous actin.  
22 Scale bar: 30  $\mu$ m. See **Supplementary Fig. 1** for the cytological analysis of  
23 additional oogenesis stages. **F.** dMLL3/4 is dispensable for a normal meiotic  
24 metaphase I (MI) arrest. Two different configurations were observed: a tightly

1 packaged chromosome mass (full chromosome retraction) and a more  
2 distended plate (partial chromosome retraction, as in the depicted micrographs).  
3 ANOVA; NS. Scale bar: 2  $\mu\text{m}$ . Quantification of the control group has already  
4 been published [30]. See **Supplementary Fig. 2** for oocyte chromatin  
5 architecture during prophase I.

6

7 **Figure 2. dMLL3/4 is critically required for the remodeling of the two**  
8 **parental genomes at fertilization.**

9 **A.** dMLL3/4-depleted eggs are incapable of forming the male pronucleus (PN)  
10 after fertilization. In such conditions, paternal chromatin ( $\sigma^{\text{♂}}$ ) remains in a  
11 condensed sperm-like state. The *sra*<sup>-/-</sup> mutant was used as control for male PN  
12 formation. ♀: female meiotic products (polar body: PB). Error bars represent  
13 standard deviation and asterisks indicate significant difference (ANOVA;  $P \leq$   
14 0.0002). Scale bars: 2  $\mu\text{m}$  (for  $\sigma^{\text{♂}}$  insets) and 10  $\mu\text{m}$ . **B.** dMLL3/4-depleted eggs  
15 are unable to remove protamine B from the sperm DNA. ANOVA;  $P < 0.0001$ .  
16 The dashed yellow line delimits the egg's cytoplasm. Scale bars: 2  $\mu\text{m}$  (for  $\sigma^{\text{♂}}$   
17 insets) and 10  $\mu\text{m}$ . **C.** dMLL3/4 is required for normal female meiotic  
18 completion. PB chromatin morphology was used as read-out for successful  
19 meiotic completion. dMLL3/4 depletion led to significant deviations to the normal  
20 PB rosette conformation. ANOVA;  $P < 0.0001$ . Scale bars: 5  $\mu\text{m}$ . **D.** Meiotic  
21 progression is not affected in dMLL3/4-depleted eggs. PB formation was used  
22 as read-out for the progression through the two meiotic divisions. The *sra*<sup>-/-</sup>  
23 mutant was used as positive control for a female meiotic block. Arrowhead:  
24 meiosis I-arrested chromatin (compare size with that of PBs). Scale bars: 5  $\mu\text{m}$ .

1

2 **Figure 3. dMLL3/4 defines the expression of a small, functionally coherent**  
3 **maternal gene subset.**

4 **A.** Germ line-specific depletion of dMLL3/4 during oogenesis affects a small  
5 number of maternal transcripts. Differently expressed genes are represented in  
6 red (adjusted  $p$ -value cut-off: 0.05). All embryos were manually isolated prior to  
7 the onset of zygotic genome activation (pre-ZGA). See panel **E** for qRT-PCR  
8 validation of selected genes and **Supplementary Table 1** for expression  
9 values. **B.** The majority of dMLL3/4-activated genes are preferentially translated  
10 during egg activation. Gene ontology (GO) analysis of this gene subset  
11 identified embryogenesis-related GO terms. Translated mRNAs in activated  
12 eggs were extracted from a previously published ribosome footprinting dataset  
13 [32]. **C.** The expression of known oocyte-to-embryo transition genes is not  
14 significantly altered in dMLL3/4-depleted eggs. FC: linear fold change in  
15 dMLL3/4 RNAi;  $p$ -val.: adjusted  $p$ -value; PN: pronucleus. See **Supplementary**  
16 **Table 2** for full expression values. **D.** IDGF4 is essential for female, but not  
17 male, fertility. See **Fig. 4** for the role of IDGF4 in the oocyte-to-embryo  
18 transition. Error bars represent standard deviation and asterisks indicate  
19 significant difference (unpaired t-test;  $P < 0.0001$ ; NS: no significant difference).  
20 Male germ line driver: *bam*-GAL4; +ve spermatogenesis control: UASp-  
21 Prp19<sup>RNAi</sup>. **E.** Real-time quantitative reverse transcription PCR (qRT-PCR)  
22 validates the downregulation observed in microarray data. Expression levels  
23 were normalized against a highly expressed reference gene (RpL32).

24

1 **Figure 4. The dMLL3/4-regulated glycosyl hydrolase IDGF4 is a new**  
2 **oocyte-to-embryo transition gene.**

3 **A.** IDGF4-depleted eggs fail to initiate embryogenesis. Compare with the similar  
4 observation recorded in dMLL3/4-depleted eggs (see **Fig. 1C**). Driver: *nos-*  
5 *GAL4*. The dashed yellow line delimits the egg's cytoplasm. Error bars  
6 represent standard deviation and asterisks indicate significant difference  
7 (unpaired t-test;  $P < 0.0001$ ). Scale bar: 30  $\mu\text{m}$ . **B.** IDGF4 is required for normal  
8 maternal meiotic completion. Polar body (PB) chromatin morphology was used  
9 as read-out for successful meiotic completion. Compare with the similar  
10 observation recorded in dMLL3/4-depleted eggs (see **Fig. 2C**). ANOVA;  $P <$   
11  $0.0001$ . Scale bar: 5  $\mu\text{m}$ . **C.** IDGF4-depleted eggs assemble mitotically-deficient  
12 zygotic chromatin. Such chromatin was arrested at a pre-mitotic state. ANOVA;  
13  $P < 0.0001$ . Scale bars: 30  $\mu\text{m}$  (egg) and 5  $\mu\text{m}$  (inset). **D.** IDGF4 is specifically  
14 required for the phosphorylation of histone H3 in zygotic chromatin. Although  
15 histone H3 serine 10 phosphorylation (pSer10 H3) was virtually undetectable in  
16 zygotic chromatin (Z), the same embryos displayed high levels of this  
17 modification in their PB chromosomes. Signal quantification is expressed in  
18 fluorescence arbitrary units (AU). Scale bars: 30  $\mu\text{m}$  (egg) and 5  $\mu\text{m}$  (insets). **E.**  
19 IDGF4 depletion does not abrogate the acetylation of histone H4 (H4ac) in  
20 zygotic chromatin. For comparison, the early zygotic chromatin of control  
21 embryos (mitotic cycle 4-6) is depicted. Scale bars: 5  $\mu\text{m}$ .

22

23 **Figure 5. Proposed model for the dMLL3/4-regulated acquisition of**  
24 **embryo fate at fertilization.**

1 As oocytes develop, the Trithorax group protein dMLL3/4 promotes the  
2 expression of a small subset of genes. The products of these genes (in red) are  
3 dispensable for normal oogenesis but their storage in the mature oocyte  
4 (alongside other maternal effect genes, in grey) is fundamental for the correct  
5 assembly of the zygotic genome at fertilization. The glycosyl hydrolase IDGF4 is  
6 one of the dMLL3/4-regulated genes critically required for the oocyte-to-embryo  
7 transition.

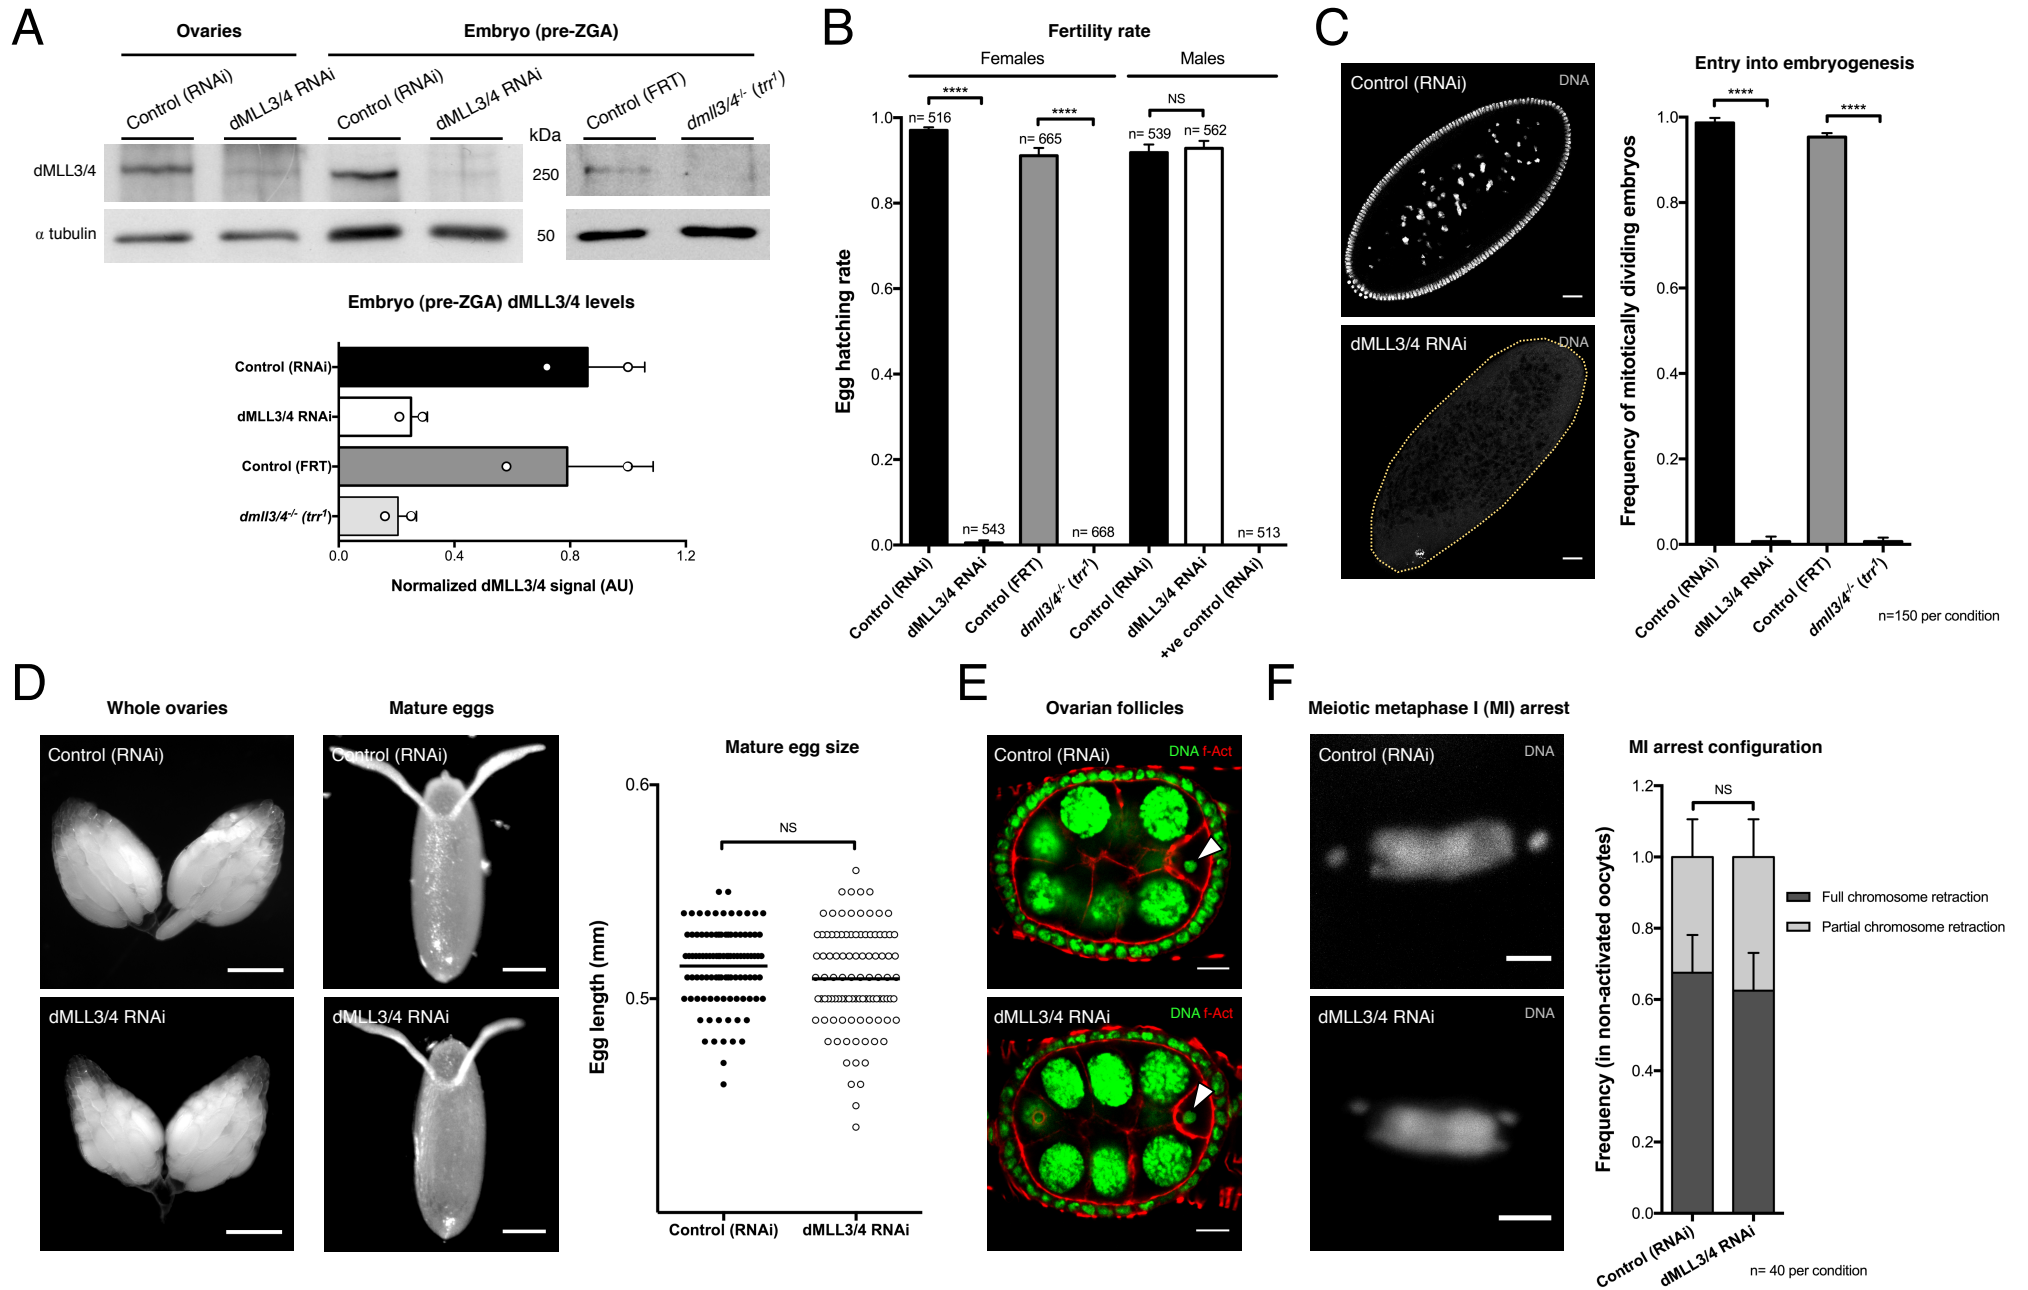

Figure 1

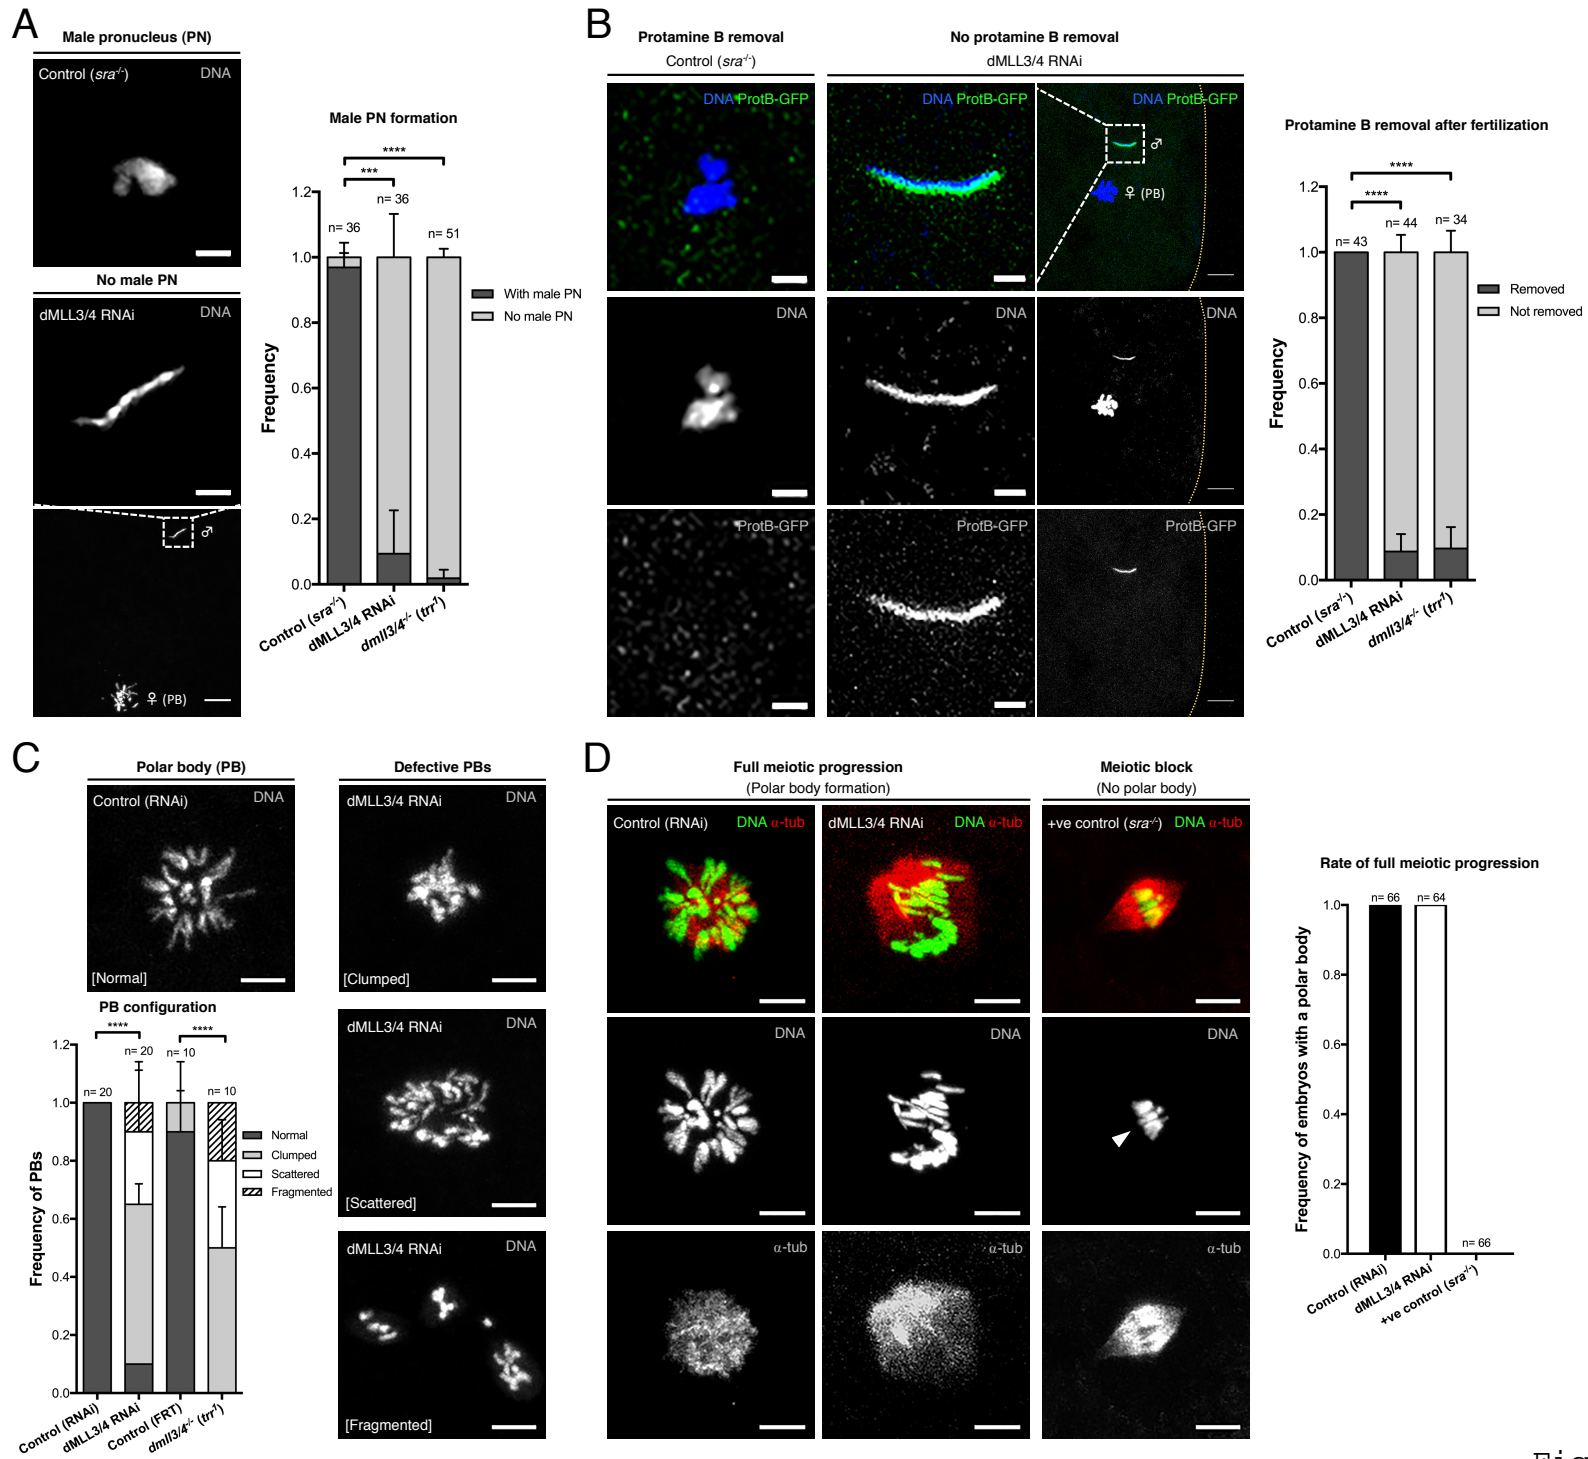

Figure 2



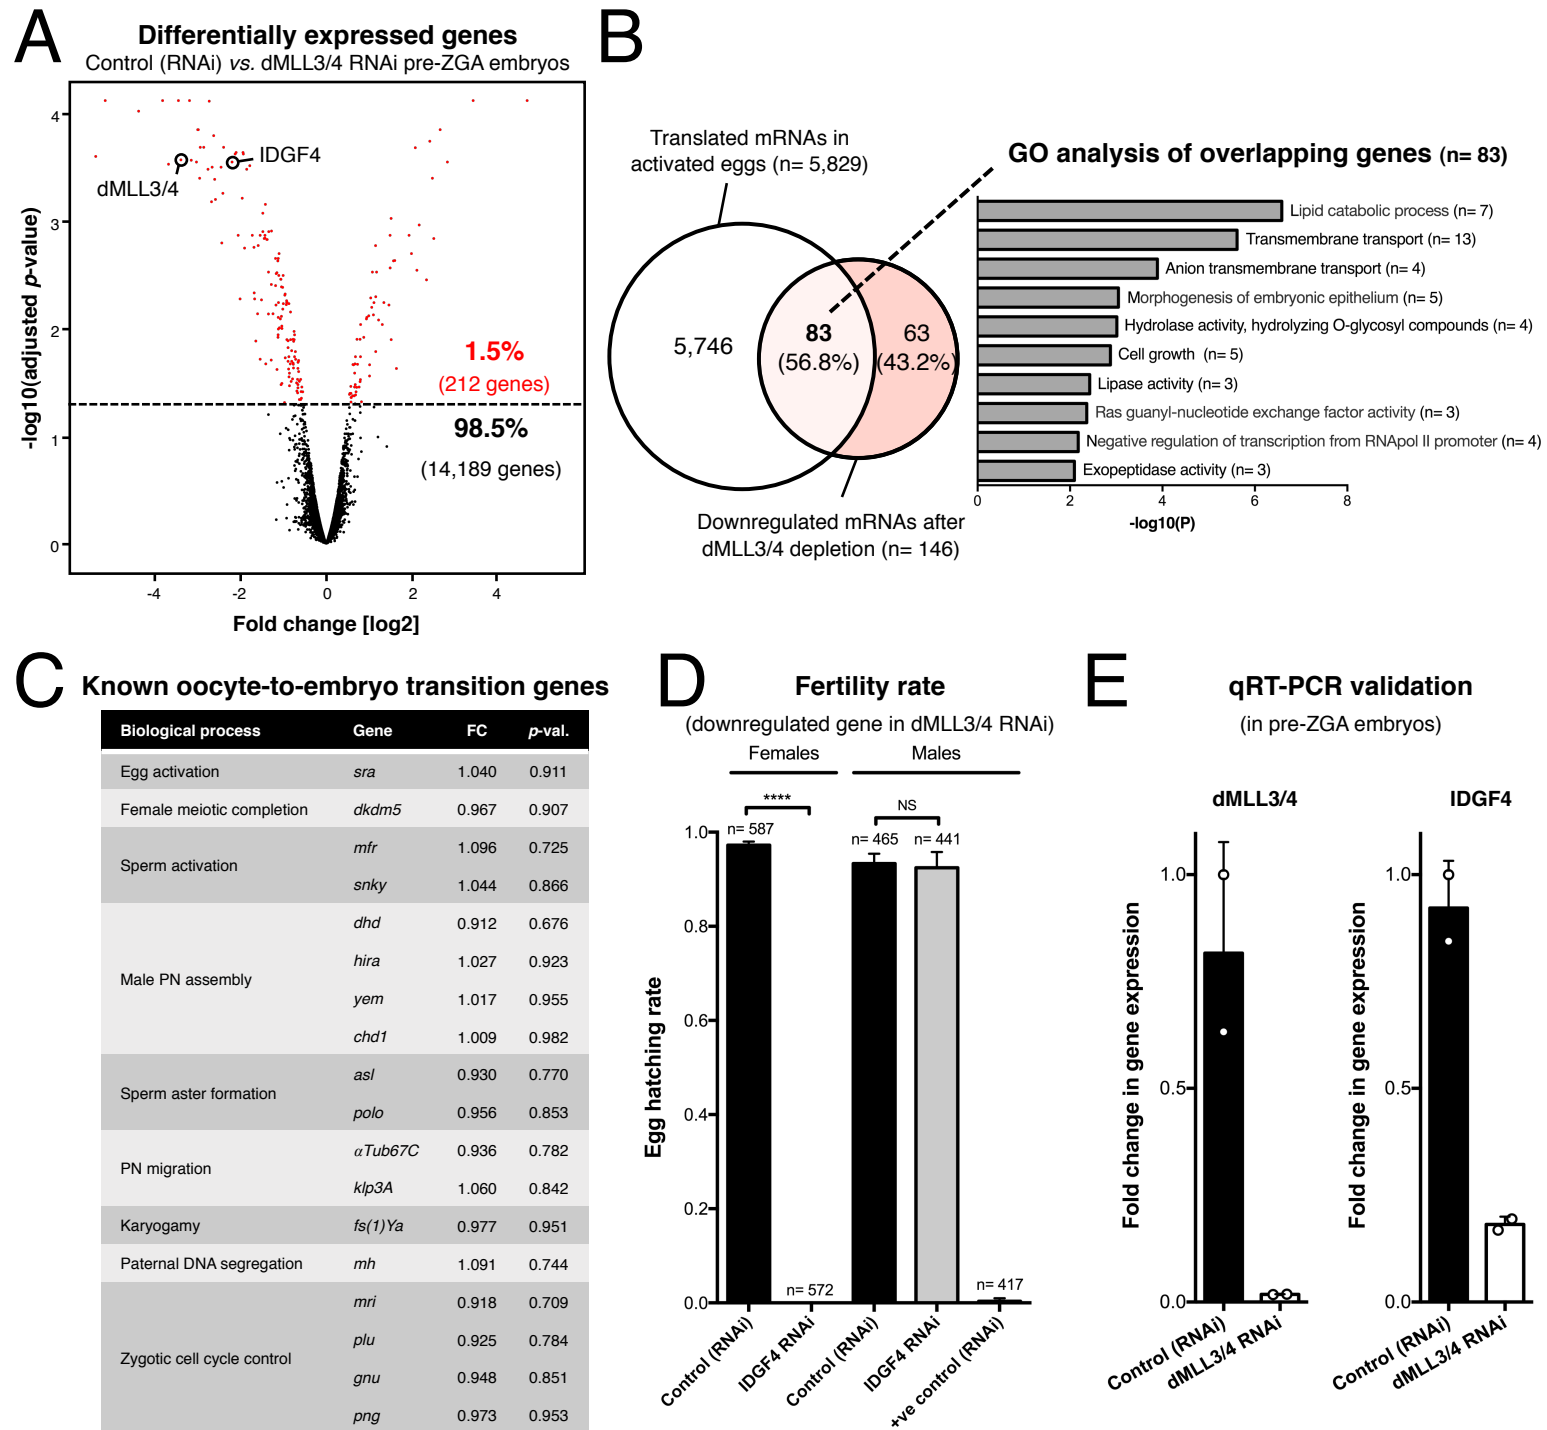

Figure 3

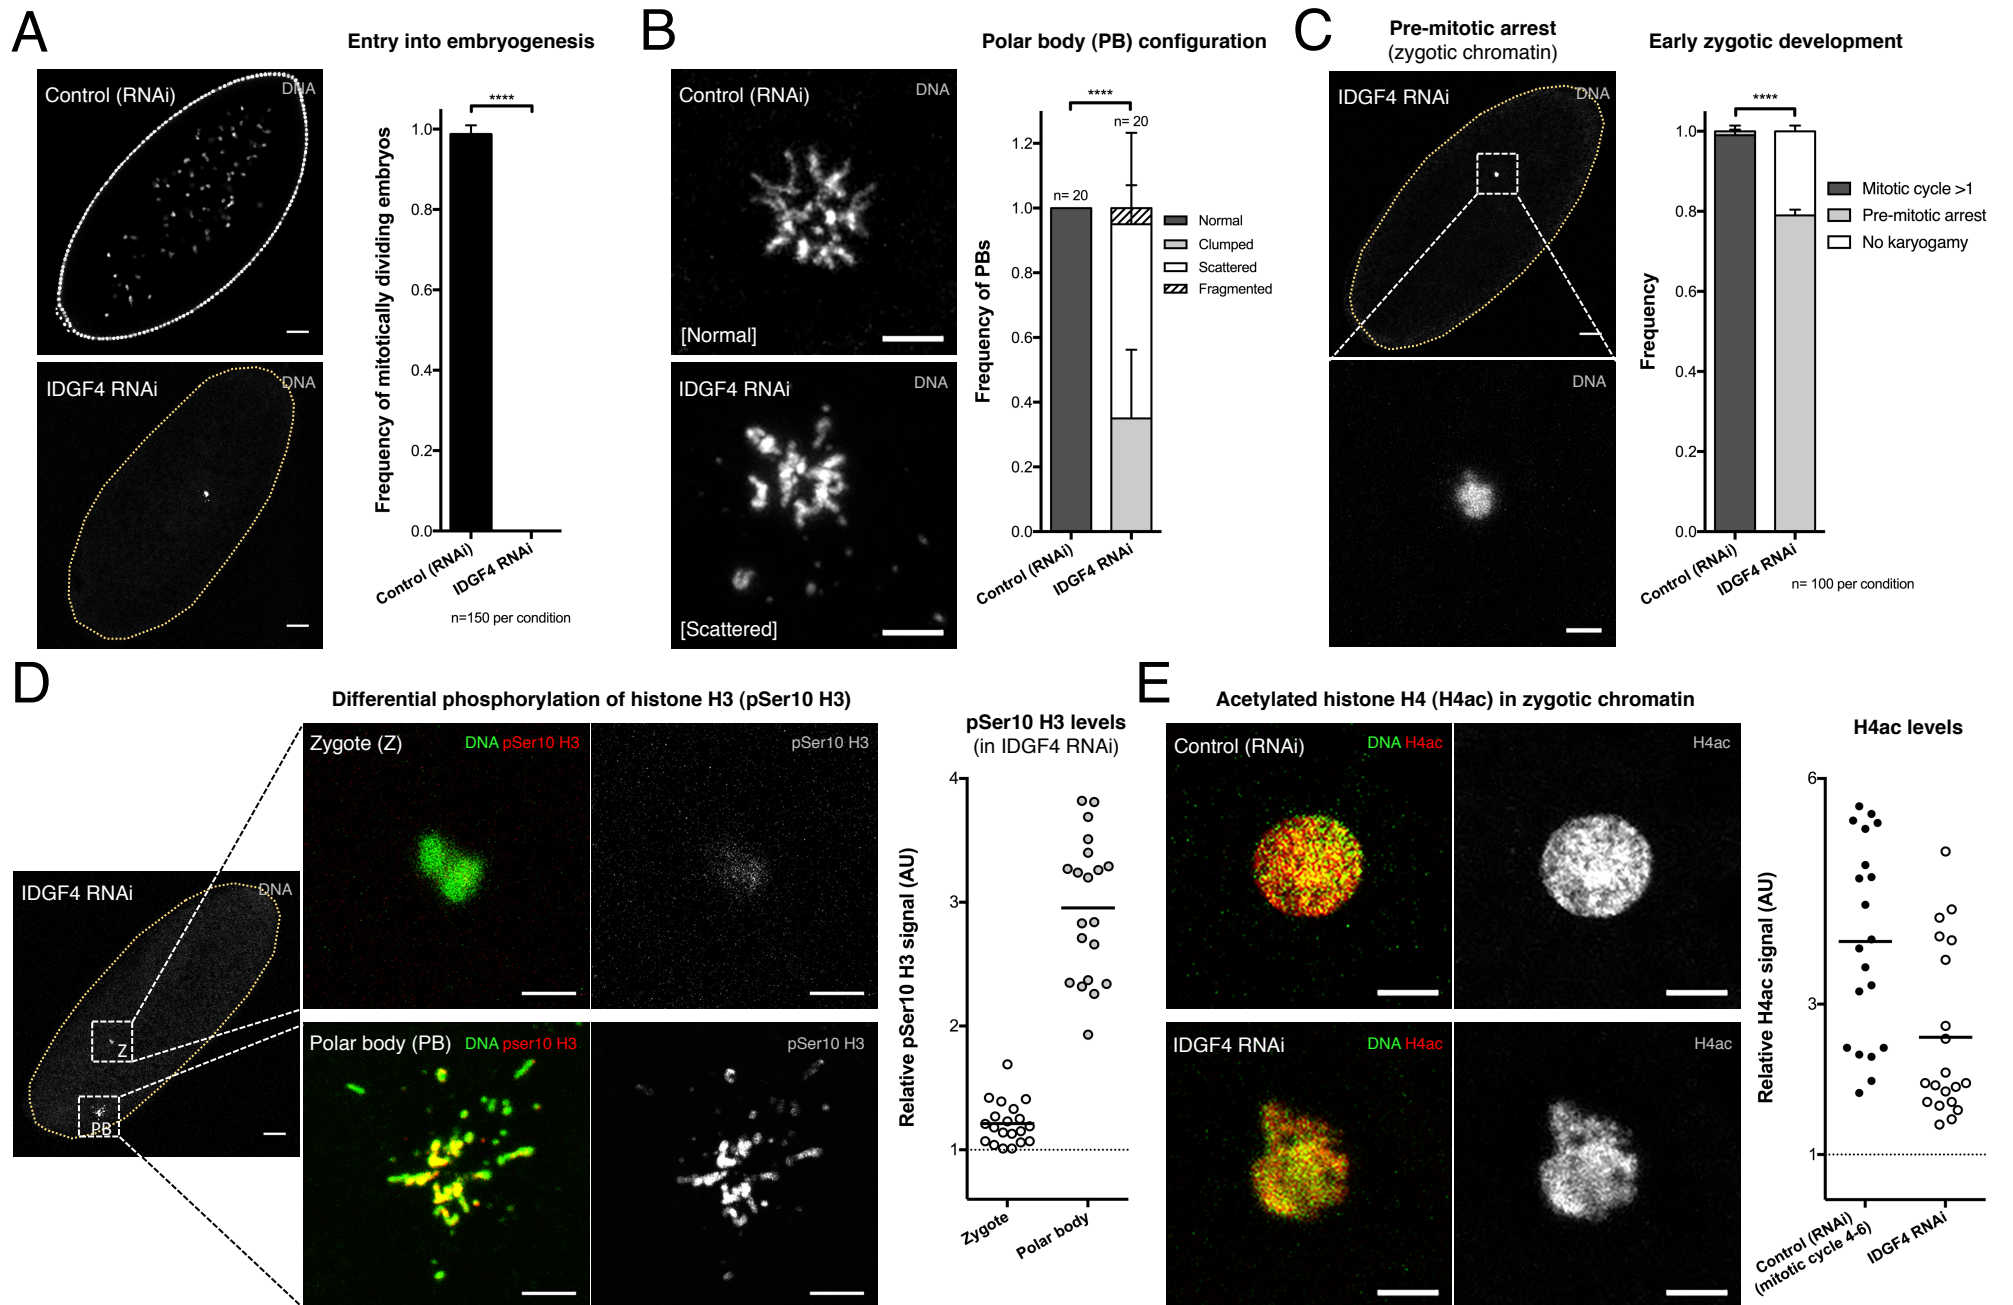

Figure 4

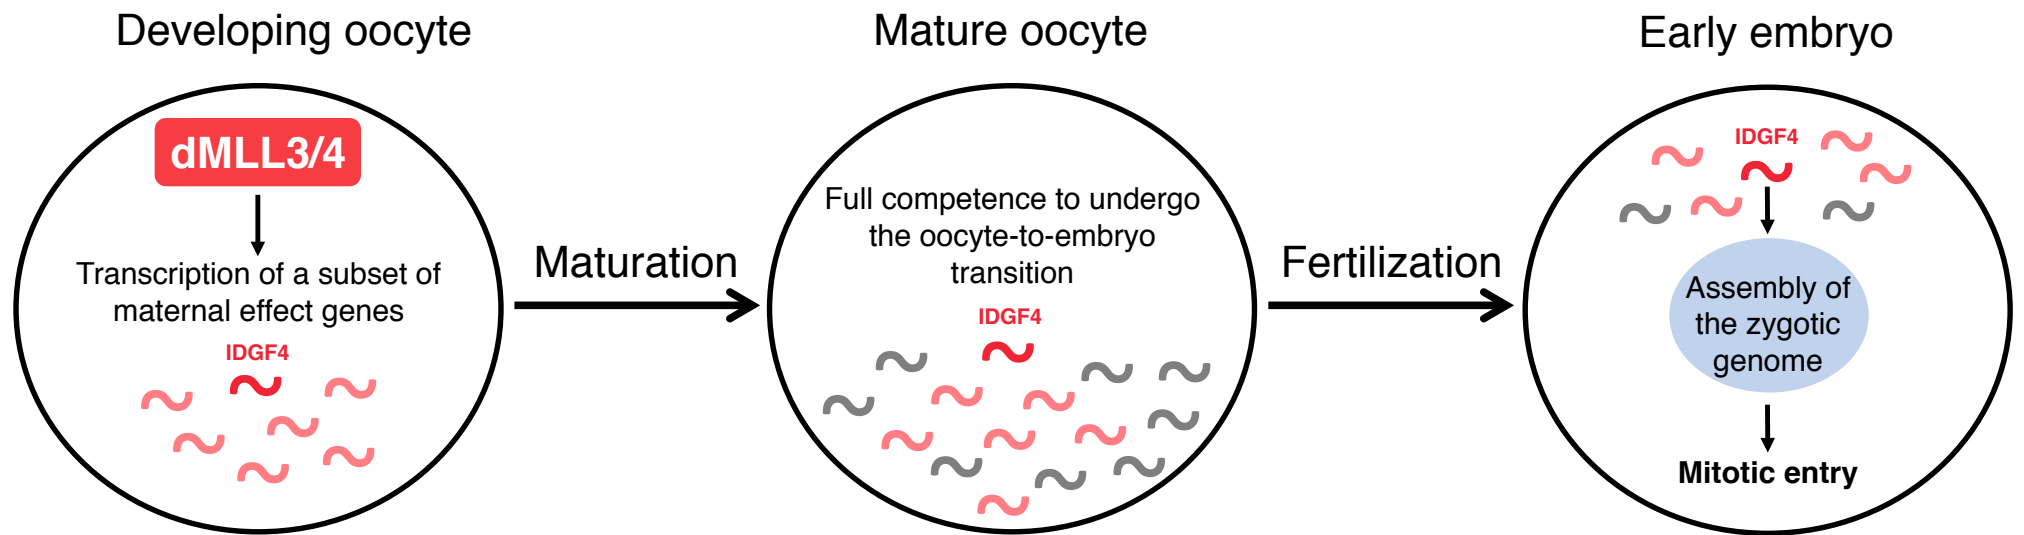

Figure 5
